1 **Analysis of allelic cross-reactivity of monoclonal IgG antibodies by a**  
2 **multiplexed reverse FluoroSpot assay**

3 Henriette Hoffmann-Veltung<sup>1</sup>, Nsoh Godwin Anabire<sup>1,2,3,\*</sup>, Michael Fokuo Ofori<sup>3</sup>, Peter Janhmatz<sup>4</sup>,  
4 Niklas Ahlborg<sup>4,5</sup>, Lars Hviid<sup>1,6</sup>, Maria del Pilar Quintana<sup>1#</sup>

5 <sup>1</sup>Centre for Medical Parasitology, Department of Immunology and Microbiology, Faculty of  
6 Health and Medical Sciences, University of Copenhagen, Copenhagen, Denmark; <sup>2</sup>West African  
7 Centre for Cell Biology of Infectious Pathogens, Department of Biochemistry, Cell and Molecular  
8 Biology, University of Ghana, Accra, Ghana; <sup>3</sup>Department of Immunology, Noguchi Memorial  
9 Institute for Medical Research, University of Ghana, Accra, Ghana; <sup>4</sup>Mabtech AB, Nacka Strand,  
10 Sweden; <sup>5</sup>Department of Molecular Biosciences, The Wenner-Gren Institute, Stockholm, Sweden;  
11 <sup>6</sup>Department of Infectious Diseases, Rigshospitalet, Copenhagen, Denmark

12 \*Current address: Department of Biochemistry and Molecular Medicine, School of Medicine,  
13 University for Development Studies, Tamale, Ghana

14 #Correspondance: [pilar@sund.ku.dk](mailto:pilar@sund.ku.dk)

15 **Abstract**

16 The issue of antibody cross-reactivity is of central importance in immunology, and not least in  
17 protective immunity to *Plasmodium falciparum* malaria, where key antigens show substantial allelic  
18 variation (polymorphism). However, serological analysis often does not allow the distinction  
19 between true cross-reactivity (one antibody recognizing multiple antigen variants) and apparent  
20 cross-reactivity (presence of multiple variant-specific antibodies), as it requires analysis at the single  
21 B-cell/monoclonal antibody level. ELISpot is an assay that enables that, and a recently developed  
22 multiplexed variant of ELISpot (FluoroSpot) facilitates simultaneous assessment of B-cell/antibody  
23 reactivity to several different antigens. In this study, we present a further enhancement of this assay  
24 that makes direct analysis of monoclonal antibody-level cross-reactivity with allelic variants feasible.  
25 Using VAR2CSA-type PfEMP1 – a notoriously polymorphic antigen involved in the pathogenesis of  
26 placental malaria – as a model, we demonstrate the robustness of the assay and its applicability to  
27 analysis of true cross-reactivity of monoclonal VAR2CSA-specific antibodies in naturally exposed  
28 individuals. The assay is adaptable to the analysis of other polymorphic antigens, rendering it a  
29 powerful tool in studies of immunity to malaria and many other diseases.

## 30 Introduction

31 Malaria is a serious infectious disease caused by mosquito-transmitted protozoan parasites of the  
32 genus *Plasmodium*. At least five species of these parasites can cause disease in humans, but by far  
33 the most serious is *P. falciparum*. This parasite alone was responsible for an estimated 241 million  
34 disease episodes and 627,000 deaths in 2020, mainly in sub-Saharan Africa (WHO, 2021).

35 Acquired immunity to *P. falciparum* malaria following natural exposure is mediated mainly by IgG  
36 antibodies with specificity for the asexual blood stages of the infection (Cohen *et al.*, 1961;  
37 Sabchareon *et al.*, 1991). However, acquisition of protection following natural exposure takes years  
38 to develop, and complete protection is rarely if ever achieved (reviewed by Hviid, 2005). The  
39 extensive inter-clonal polymorphism and intra-clonal variation of key parasite antigens appear to be  
40 important reasons. Consequently, the identification of conserved and functionally important  
41 antibody epitopes in key antigens is a major goal of malaria immunology research. However, it is a  
42 goal that is difficult to achieve using conventional approaches such as analysis of immune sera by  
43 enzyme-linked immunosorbent assay (ELISA). A major obstacle is the inability to separating true (i.e.,  
44 a single antibody that recognizes a conserved epitope shared by multiple allelic variants, Figure 1A)  
45 from apparent cross-reactivity (multiple antibodies, each recognizing a variant-specific epitope,  
46 Figure 1B), because this requires analysis at the single B-cell level.

47 The development of a B-cell ELISpot assay was a first step towards that (Czerkinsky *et al.*, 1983).  
48 In the assay, each spot corresponds to the antibodies secreted by a single B-cell, i.e., to a  
49 monoclonal antibody. The ELISpot assay has since been modified to allow detection of the antibody-  
50 secreting B cells (ASC) by fluorescence and concomitant detection of several antibody specificities  
51 (reverse FluoroSpot) (Hadjilaou *et al.*, 2015). Further modifications enabled determination of  
52 antibody cross-reactivity with allelic variants of the same antigen (Adam *et al.*, 2018), and employing  
53 a “plug-and-play” approach that facilitates adaptation of the assay to antigens of choice (Jahnmatz  
54 *et al.*, 2016). In the present report, we describe a further derivation of the FluoroSpot assay that  
55 combines these advantages and validate its performance using allelic variants of highly polymorphic  
56 VAR2CSA-type PfEMP1 (Bockhorst *et al.*, 2007; Salanti *et al.*, 2003; Trimnell *et al.*, 2006). PfEMP1 is a  
57 family of proteins that appears to be an antibody target of central importance to acquisition of  
58 clinical immunity to *P. falciparum* malaria (reviewed by Hviid and Jensen, 2015). Despite the  
59 undoubted clinical importance of particular types of PfEMP1 in the pathogenesis of severe malaria  
60 complications such as cerebral and placental malaria (Jensen *et al.*, 2004; Lennartz *et al.*, 2017;  
61 Salanti *et al.*, 2004; Turner *et al.*, 2013), the extensive polymorphism of these antigens jeopardizes  
62 the development of efficacious PfEMP1-based vaccines (reviewed by Hviid *et al.*, 2018). VAR2CSA is  
63 responsible for the accumulation of infected erythrocytes (IEs) in the placenta (Salanti *et al.*, 2004).

64 This can lead to placental malaria, which affects about a third of all pregnancies in malaria-endemic  
65 areas and is the direct cause of substantial maternal, fetal and infant morbidity (WHO, 2021). It was  
66 recently reported that vaccines, based on the minimal binding domain that is assumed to be a  
67 functionally conserved region of VAR2CSA mediating placental IE sequestration by binding to  
68 oncofetal chondroitin sulfate A, induced a variant-specific rather than cross-reactive antibody  
69 response (Mordmuller *et al.*, 2019; Sirima *et al.*, 2020). These findings underscore the need to  
70 identify genuinely cross-reactive antibody epitopes. The new “plug-and-play” FluoroSpot assay  
71 described and validated here facilitates such an effort. While applied here to the study of cross-  
72 reactivity with allelic variants of VAR2CSA, it can easily be adapted for examination of other  
73 polymorphic antigens that are known or suspected targets of antibody-mediated protective  
74 immunity to malaria and other infectious diseases.

## 75 Results

### 76 *Production and quality control of recombinant antigens*

77 We produced recombinant proteins corresponding to four allelic variants (IT4, NF54, M920,  
78 Malayan Camp) of the ID1-ID2, DBL3X, and DBL5 $\epsilon$  regions of *P. falciparum* VAR2CSA in human  
79 embryonic kidney cells. Each recombinant antigen included one of four peptide tags (GAL, TRAP,  
80 TWIN, WASP) to enable “plug-and-play” detection with standard, tag-specific and fluorescently  
81 labeled reagents (Figure 1C). All the recombinant proteins appeared as single bands at the expected  
82 sizes in Instant Blue-stained SDS-PAGE gels (Figure 1, figure supplement 1). All the recombinant  
83 antigens were specifically recognized in the sex-specific manner (recognized by plasma IgG from  
84 *P. falciparum*-exposed women but not from sympatric men) typical of VAR2CSA (Fried *et al.*, 1998;  
85 Ricke *et al.*, 2000; Salanti *et al.*, 2004), when tested in ELISA (Figure 1, figure supplement 2). The IT4  
86 ID1-ID2 allelic variant was produced with each of the four tags to allow testing of the performance of  
87 the assay in various configurations (see below). Each of the differently tagged versions of IT4 ID1-ID2  
88 reacted identically with the different plasma IgG pools (Figure 1, figure supplement 2A). The allelic  
89 variants of DBL3X and DBL5 $\epsilon$  were therefore produced with one tag only (Figure 1C). We conclude  
90 that the quality of all the VAR2CSA region constructs produced was satisfactory.

91 We next used ELISA to test the recognition of the recombinant antigens by monoclonal  
92 antibodies with known specificity for the relevant regions of VAR2CSA. The mouse monoclonal  
93 antibody 6E2, derived from a mouse immunized with recombinant IT4 ID1-ID2 (unpublished data),  
94 reacted with the IT4, NF54, and M920 allelic variants of ID1-ID2, but did not react with Malayan  
95 Camp ID1-ID2 (Figure 1 – figure supplement 3A). The DBL3X-specific human monoclonal antibodies  
96 PAM2.8 and PAM8.1 reacted with all four allelic variants of DBL3X, although PAM8.1 recognized  
97 NF54 DBL3X less well than the other variants. The DBL5 $\epsilon$ -specific human monoclonal antibody  
98 PAM3.10 recognized all four variants of VAR2CSA-DBL5 $\epsilon$  equally well. PAM1.4, reported to recognize  
99 a conserved, but conformational and probably discontinuous epitope in VAR2SCA (Barfod *et al.*,  
100 2007), did not recognize any of the VAR2CSA region constructs (Figure 1 – figure supplement 3B). All  
101 the tested antibodies, including PAM1.4, recognized a recombinant protein representing the full  
102 ectodomain of IT4 VAR2CSA (also known as IT4VAR04). A DBL4 $\epsilon$  domain from a non-VAR2CSA  
103 PfEMP1 protein was not recognized by any of the monoclonal antibodies, underscoring their  
104 VAR2CSA-specificity. Taken together, these findings correspond fully with previous evidence  
105 regarding the allelic variant-specificity of the monoclonal antibodies (Barfod *et al.*, 2010), and thus  
106 further underpin the quality of the peptide-tagged antigens produced here.

107 As a final step in the quality assessment of the peptide-tagged antigens, we assessed the ability of  
108 the tag detection reagents to identify them by ELISA (Figure 1 – figure supplement 4). Most of the  
109 tagged proteins were recognized exclusively by the detection reagent corresponding to the  
110 incorporated tag. However, the TRAP-specific detection reagent showed minor cross-reactivity with  
111 the WASP-tagged Malayan Camp DBL3X antigen and the M920 DBL5e allelic variant was not well  
112 recognized. We conclude from these experiments that the tagging of the antigens was adequate,  
113 except for M920 DBL5e.

#### 114 *Quality control of assay performance*

115 We first analyzed the performance of the FluoroSpot assay without any multiplexing, i.e.,  
116 employing a single antigen and a single detection reagent. This configuration (1×1) corresponds to a  
117 basic reverse ELISpot assay, except for the use of a fluorescent rather than an enzymatic detection  
118 system. For this analysis, we used a mouse hybridoma secreting the ID1-ID2-specific monoclonal  
119 antibody 6E2, a tagged IT4 ID1-ID2 antigen and the corresponding tag-specific detection reagent. For  
120 each matching tag/detection reagent combination (Figure 2 – figure supplement 1A), we detected  
121 similar numbers of spots, each corresponding to a 6E2-secreting hybridoma cell (Figure 2A). Spots  
122 were exclusively detected in the instrument channel corresponding to the detection reagent used  
123 (Figure 2 – figure supplement 2A). In other words, only single-colored spots of the expected color  
124 were detected. These results documented the assay's ability to detect individual ASC by the  
125 reactivity of the secreted monoclonal antibody with cognate tagged antigen. Detection was highly  
126 specific and independent of the tag/detection reagent combination used.

127 We next tested 1×4 (one tagged antigen assayed with four different detection reagents) and 4×1  
128 (four differently tagged versions of one antigen assayed with one detection reagent) configurations  
129 of the assay (Figure 2 – figure supplement 1B-C). For these experiments, we used the 6E2-secreting  
130 hybridoma, tagged IT4 ID1-ID2 antigens, and detection reagents as above. In each of the 1×4  
131 configurations (Figure 2, – figure supplement 1B), spots were exclusively detected in the correct  
132 channel (Figure 2 – figure supplement 2B), with similar spot counts among the different 1×4 designs  
133 and corresponding to the results obtained with the 1×1 design (Figure 2A). The results document  
134 that the presence of multiple detection reagents did not affect assay performance. In each of the  
135 four complementary (4×1) configurations (Figure 2 – figure supplement 1C), again spots were  
136 exclusively detected in the correct channel (Figure 2 – figure supplement 2C), with similar spot  
137 counts regardless of the detection reagent used, and corresponding to the results obtained with the  
138 1×1 and 1×4 configurations (Figure 2A). The results document that the simultaneous use of multiple  
139 tagged versions of the same antigen did not affect assay performance.

140 Finally, we tested the assay in its intended 4×4 configuration, using four differently tagged  
141 versions of the same antigen, assayed with four different detection reagents (Figure 2 – figure  
142 supplement 1D). Cells and reagents for these experiments were the same as above. As in the  
143 previous configurations, we detected similar numbers of spots (Figure 2B), corresponding closely to  
144 those detected in the 1×1, 1×4, and 4×1 configurations. Of note, most of the spots were detected by  
145 at least two (and primarily by four) of the tag detection reagents (Figure 2B). The analysis software  
146 used allowed analysis also of the relative spot volume (RSV), which is a calculated value integrating  
147 information about the size and fluorescence intensity of each spot. The RSV thus reflects the amount  
148 and affinity of the secreted monoclonal antibody (Jahnmatz *et al.*, 2020). Although spot numbers  
149 were consistent in all configurations, RSV values were consistently higher for configurations with  
150 only one tagged antigen (1×1 and 1×4) than configurations with differently tagged versions of the  
151 antigen (4×1 and 4×4) (Figure 2C). This likely reflects competition among the differently tagged  
152 versions of the IT4 ID1-ID2 antigen for binding to captured 6E2 antibodies when all versions were  
153 added together. We conclude from these experiments that our FluoroSpot assay produced reliable  
154 and consistent results, regardless of the complexity of multiplexing.

#### 155 *Validation of assay performance*

156 Our goal with the FluoroSpot assay validated above was to use it for determination of the degree  
157 of “true” (monoclonal) antibody cross-reactivity with allelic variants of the same antigen. We tested  
158 this application with four allelic variants (IT4, NF54, M920 and Malayan Camp) of three regions  
159 (ID1-ID2, DBL3X, and DBL5ε) of VAR2CSA. When all four allelic variants of ID1-ID2 and all four  
160 detection reagents were added to secreted and captured 6E2 antibody (Figure 3 – figure supplement  
161 1A), spots were only detected with the IT4 allele reagent (TWIN) and M920 allele reagent (WASP)  
162 (Figure 3A), indicating the presence of a strongly 6E2-crossreactive epitope present in IT4 and M920,  
163 which is absent from NF54 and Malayan Camp. This conclusion was supported by the fact that most  
164 of the detected spots were double-positive. However, in the initial ELISA experiments, 6E2 reacted  
165 with the NF54 allele of ID1-ID2, in addition to its reaction with the IT4 and M920 alleles (Figure 1 –  
166 figure supplement 3). We therefore tested if the absence of 6E2 reactivity to NF54 ID1-ID2 in the  
167 FluoroSpot assay was related to the multiplexing, despite the assay validation experiments described  
168 above. The results obtained with 1×1, 1×4, and 4×1 configurations (Figure 3 – figure  
169 supplement 1B-D), corresponded very well with the results obtained with the 4×4 configuration  
170 (Figure 3), although we did detect a few faint spots with the NF54 ID1-ID2-specific detection tag  
171 (GAL) in the 4×1 configuration (Figure 3B). In agreement with the only partial cross-reactivity of 6E2  
172 with the different allelic variants of ID1-ID2, RSV values were less affected by multiplexing  
173 (Figure 3C) than when assaying 6E2 with differently tagged versions of the same ID1-ID2 allele (IT4)

174 (Figure 2C), consistent with a lower degree of antigen competition for bound antibody. These results  
175 show that detection of true allelic cross-reactivity of monoclonal antibodies is possible with the  
176 FluoroSpot assay, although some low-affinity cross-reactivity might be missed.

177 We next performed experiments with four human B-cell clones derived from Epstein-Barr virus  
178 immortalized memory B cells obtained from women with natural exposure to placental malaria.  
179 These experiments were done to substantiate the versatility of the assay, in particular its application  
180 to analysis of human B cells and antibodies. The clones PAM2.8 and PAM8.1 react with several allelic  
181 variants of DBL3X, while PAM 3.10 reacts with several DBL5 $\epsilon$  variants (Barfod *et al.*, 2007; Barfod *et*  
182 *al.*, 2010). The last clone, PAM1.4, reacts with most allelic variants of full-length VAR2CSA but does  
183 not react with any single-domain DBL constructs from any VAR2CSA variant tested so far. It was  
184 therefore included here as a negative control.

185 In the fully multiplexed 4 $\times$ 4 configuration of the assay (Figure 4 – figure supplement 1A), the  
186 PAM2.8-secreting clone produced spots that could be detected with all four allelic variants of DBL3X,  
187 with most spots reacting with three or four of the detection reagents (Figure 4A). The PAM8.1  
188 antibody reacted with the IT4, M920 and Malayan Camp allelic variants of DBL3X, but was non-  
189 reactive with NF54 DBL3X as expected, since this particular variant lacks the linear epitope  
190 recognized by PAM8.1. Most spots reacted with two or three detection reagents (Figure 4B). In the  
191 same assay configuration, but employing allelic variants of DBL5 $\epsilon$  rather than DBL3X (Figure 4 –  
192 figure supplement 1A), PAM3.10 was shown to cross-react with all four allelic variants DBL5 $\epsilon$ , and  
193 mainly produced spots reacting with three or four of the detection reagents (Figure 4C). Results of  
194 supplementary experiments with the more restricted configurations of the assay (Figure 4 – figure  
195 supplement 1B-D) were in broad agreement with the 4 $\times$ 4 configuration results (Figure 4 – figure  
196 supplements 2-4). We did not observe any spots when testing the PAM1.4-secreting clone in the  
197 FluoroSpot assay (4 $\times$ 4 configuration) with any of our DBL3X or DBL5 $\epsilon$  allelic variants (data not  
198 shown). All these results were consistent with those obtained with ELISA (Figure 1 – figure  
199 supplement 3) and with previous reports on the specificity of these monoclonal antibodies (Barfod  
200 *et al.*, 2007; Barfod *et al.*, 2010). RSV values were consistently higher for configurations with only a  
201 single tagged allelic variant (1 $\times$ 1 and 1 $\times$ 4) than for configurations with multiple, differently tagged  
202 allelic variants of the antigen present (4 $\times$ 1 and 4 $\times$ 4) (Figure 4 – figure supplement 5). On the above  
203 basis, we concluded that our assay was able to reliably quantify cross-reactivity of monoclonal  
204 antibodies with up to four allelic variants of the same antigen.

#### 205 *Pilot application of assay*

206 In the final set of experiments, we applied the validated assay to analysis of samples of peripheral  
207 blood mononuclear cells (PBMC) from seven women with previous natural exposure to VAR2CSA-



208 type PfEMP1 proteins during *P. falciparum* infection-exposed pregnancies. PBMC from three  
209 sympatric men were included as negative controls. After induction of memory B-cell differentiation  
210 to ASC as described elsewhere (Jahnmatz *et al.*, 2013), the PBMC samples were assayed for ASC  
211 secreting IgG of any specificity (total IgG) and IgG antibodies specific for the four allelic variants of  
212 the VAR2CSA ID1-ID2, DBL3X and DBL5 $\epsilon$  regions described above. The frequencies of ASC secreting  
213 VAR2CSA-specific IgG tended to be higher among women than among the men, where only low  
214 frequencies were detected (Figure 5). Although the difference was statistically significant for the  
215 ID1-ID2 region only (probably due to the low number of individuals tested), the pattern was the  
216 same for all the VAR2CSA regions tested and fully consistent with the well-established pregnancy-  
217 dependency of acquisition of substantial antibody reactivity to VAR2CSA. Most of the spots detected  
218 were single-colored (Figure 5 and Figure 5 – figure supplement 1), indicating that most corresponded  
219 to antibodies recognizing variant-specific epitopes not conserved among the tested allelic variants.  
220 For five of the samples, sufficient cells were available to also test them in the 1 $\times$ 1 configuration. No  
221 systematic differences in spot numbers or RSV values were detected between the 4 $\times$ 4 and 1 $\times$ 1  
222 configurations (Figure 5 – figure supplement 2). We conclude that the assay performed as expected,  
223 but that larger studies will be required to draw detailed conclusions regarding the level of antibody  
224 cross-reactivity with allelic variants of polymorphic antigens present in samples collected from  
225 naturally exposed women.

## 226 Discussion

227 Clinical protection against malaria in areas with stable transmission of *P. falciparum* parasites is  
228 acquired in a piecemeal fashion over several years. This slow rate of acquisition, and the fact that  
229 sterile protection following natural exposure is very rarely achieved, is often attributed to the very  
230 substantial polymorphic (allelic or inter-clonal) variation of the antigens that are important for  
231 protection (reviewed by Hviid, 2005). It is assumed that allelic variation represents an important  
232 immune-evasive strategy of the malaria parasites and that acquisition of broadly cross-reactive  
233 antibodies to key antigens following natural exposure is rare. Instead, acquisition of protection is  
234 thought to rely on the accumulation of a broad repertoire of antibodies, which may each be variant-  
235 specific, but which together cover the repertoire of allelic antigen variants (Bull *et al.*, 1998; Nielsen  
236 *et al.*, 2002).

237 The above scenario has prompted a search for epitopes that are shared among multiple allelic  
238 variants (i.e., conserved epitopes) in key antigens. Identification of conserved epitopes is of  
239 particular importance in the development of efficacious vaccines against malaria, not least those  
240 based on PfEMP1. Although these vaccine candidates have the advantage of being based on  
241 antigens with well-documented roles in malaria pathogenesis and acquired immunity to various  
242 severe manifestation of the disease, they suffer from the presence of numerous allelic variants,  
243 thought by many to preclude their utility in vaccine development (reviewed by Hviid *et al.*, 2018).  
244 The recent reports documenting marked variant-specificity of antibodies induced by vaccination  
245 with the supposedly conserved minimal binding domain of VAR2CSA illustrates this concern  
246 (Mordmuller *et al.*, 2019; Sirima *et al.*, 2020). This notwithstanding, it is evident that VAR2CSA-  
247 specific B cells that secrete broadly cross-reactive antibodies do exist. Thus, memory B cells from  
248 women with natural exposure to placental malaria can be induced to secrete truly cross-reactive  
249 human monoclonal antibodies that are specific for VAR2CSA-type PfEMP1 – in fact, all of the  
250 monoclonal antibodies described showed substantial allelic variant cross-reactivity (Barfod *et al.*,  
251 2007; Barfod *et al.*, 2010). VAR2CSA thus contains conserved epitopes.

252 On the above basis, we set out to develop and test an assay that would facilitate in-depth  
253 analysis of antibody cross-reactivity with allelic variants of the same polymorphic antigen. We chose  
254 VAR2CSA-type PfEMP1 as our model antigen, and included four allelic variants, obtained from the  
255 strains IT4, NF54, M920 and Malayan Camp. These strains were chosen because they are  
256 geographically and temporally distant, and because their amino acid sequences belong to distinct  
257 phylogenetic clusters (Renn *et al.*, 2021). As all PfEMP1 antigens, VAR2CSA contains several Duffy  
258 binding-like (DBL) domains, some separated by so-called interdomain (ID) regions (Hviid and Jensen,  
259 2015) (Figure 1C). For each of the chosen VAR2CSA variants, we expressed three regions: DBL3X,

260 DBL5 $\epsilon$ , and the ID1-ID2 region (Figure 1C). DBL3X and DBL5 $\epsilon$  were chosen as they appear to be  
261 dominant targets of naturally acquired and truly cross-reactive VAR2CSA-specific IgG (Barfod *et al.*,  
262 2010), while the ID1-ID2 region was selected because it includes the above-mentioned minimal  
263 binding region used as antigen in the recent vaccine trials (Mordmuller *et al.*, 2019; Sirima *et al.*,  
264 2020). It is defined as the shortest contiguous part of VAR2CSA that retains the affinity of the full-  
265 length molecule for the VAR2CSA cognate receptor, oncofetal chondroitin sulfate A (CSA) (Clausen *et*  
266 *al.*, 2012). The choice of DBL3X, DBL5 $\epsilon$  and ID1-ID2 was furthermore influenced by the convenient  
267 availability of cell lines producing monoclonal antibodies specific for them.

268 The multiplexed reverse FluoroSpot assay has previously been applied to studying the reactivity  
269 of monoclonal antibodies against four serotypes of dengue virus (DENV-1 to DENV-4) (Adam *et al.*,  
270 2018; Hadjilaou *et al.*, 2015). One study detected binding of DENV-1 to DENV-4 virions to  
271 immobilized monoclonal antibody via a panel of DENV serotype-specific monoclonal antibodies  
272 labeled by different fluorochromes (Hadjilaou *et al.*, 2015). The other study instead used  
273 fluorescently labeled virus particles representing the four dengue serotypes. We have previously  
274 described a similar assay that is easier to adapt to any antigen combination of choice than the above  
275 approaches, because it employs recombinantly tagged antigens with discrete peptides that can be  
276 detected by standardized tag-specific reagents (Jahnmatz *et al.*, 2016). The assay is thus more “Plug-  
277 and-Play”, as tagged antigens are fairly easy to generate. That version of the assay has been  
278 successfully applied to simultaneous detection of B cells secreting antibodies specific for differently  
279 tagged antigens from three different pathogens (Jahnmatz *et al.*, 2020) and for four distinct  
280 *P. falciparum* antigens (Jahnmatz *et al.*, 2021). The assay has not previously been used for analysis of  
281 antibody cross-reactivity to allelic variants of a single antigen, which is more demanding in terms of  
282 specificity (ability to distinguish between allelic variants rather than different antigens altogether).  
283 Through a series of experiments documenting the performance of the assay in multiple  
284 configurations, we could demonstrate its applicability to studying true (monoclonal) antibody allelic  
285 cross-reactivity. We furthermore documented the adaptability of the assay by applying it to the  
286 study of allelic variants of three different regions (ID1-ID2, DBL3X, DBL5 $\epsilon$ ) of VAR2CSA. Finally, we  
287 applied the assay to a pilot analysis of antibody allelic cross-reactivity among B cells from individuals  
288 with natural exposure to *P. falciparum*. Most of the B cells that secreted antibodies recognizing our  
289 test antigens only recognized a single allelic variant. This finding is in agreement with a previous  
290 study (Doritchamou *et al.*, 2016). The authors of the earlier study sequentially depleted immune sera  
291 of reactivity with allelic variants of ID1-ID2 and DBL5 $\epsilon$  (and of DBL4 $\epsilon$ , not included in our study). They  
292 concluded, like we do here, using a fundamentally different approach, that allelic cross-reactivity of

293 VAR2CSA-specific IgG appears to be very limited. This would explain the very limited cross-reactivity  
294 observed in the recent VAR2CSA vaccine trials (Mordmuller *et al.*, 2019; Sirima *et al.*, 2020).

295 While the current study was in progress, Doritchamou *et al.* reported a new study (2022), using  
296 the same approach as in their earlier study (Doritchamou *et al.*, 2016), but now employing allelic  
297 variants of the full ectodomain of VAR2CSA (Renn *et al.*, 2021) rather than the single- and oligo-  
298 domain antigens used previously (and here). The new study indicated a very marked cross-reactivity  
299 of VAR2CSA-specific antibodies, as depletion on a single allelic variant resulted in almost complete  
300 loss of reactivity with the other variants. This finding is in stark contrast to those reported here as  
301 well as in the authors' own earlier study. However, it agrees very well with our earlier reports  
302 (Barfod *et al.*, 2007; Barfod *et al.*, 2010) that VAR2CSA-specific memory B cells generated in  
303 response to natural parasite exposure tend to secrete antibodies that are broadly cross-reactive.

304 Taken together, these results suggest that broadly cross-reactive antibodies to VAR2CSA and  
305 probably to other PfEMP1 antigens – indeed, possibly to many complex, high-molecular weight  
306 proteins – target conformational epitopes that are not properly reproduced by smaller antigens  
307 consisting of domains or regions of the larger, full-length protein. Some of these – such as the  
308 epitope of the monoclonal antibody PAM1.4, which recognizes the full ectodomain of most VAR2CSA  
309 variants but not any of its constituent domains individually (Barfod *et al.*, 2007) – are likely to be  
310 composed of amino acids that are far apart in the primary sequence of the protein. However, there  
311 may be more to it than that. The PAM2.8, PAM3.10, and PAM8.1 antibodies were all obtained from  
312 B cells of individuals exposed to – and were identified by screening for reactivity with – infected  
313 erythrocytes displaying native (i.e., full-length) VAR2CSA (as were PAM1.4). It is an open question  
314 whether those antibodies – even though they were subsequently shown to react only with epitopes  
315 in either DBL3X (PAM2.8 and PAM8.1) or DBL5 $\epsilon$  (PAM3.10), would have been identified by screening  
316 for reactivity with these single domain antigens. The high degree of variant-specificity observed here  
317 and by Doritchamou *et al.* (2016) suggests that the answer is no. It also suggests that what  
318 determines the fine specificity of antibodies elicited after exposure to native complex antigens may  
319 not be the same as that determining fine specificity after subunit vaccination, even when those  
320 antibodies all recognize epitopes within the construct used for vaccination.

321 In conclusion, we have developed an assay that is suitable for interrogation of the degree of  
322 allelic cross-reactivity of monoclonal antibodies. However, our results indicate that it may also be  
323 applied to deeper investigations of how antibody fine specificity (including variant specificity versus  
324 cross-reactivity) is determined. The main caveat with respect to the conclusions drawn here is that  
325 our work was mainly a methods development study and therefore involved only a relatively small  
326 number of individuals. Larger studies should be undertaken to assess the robustness of our

- 327 preliminary conclusions regarding the frequency of allelic cross-reactivity in pregnant women  
328 naturally exposed to *P. falciparum* infection.

## 329 **Materials and methods**

### 330 *Recombinant antigens*

331 Plasmids encoding the full-length VAR2CSA ectodomains of *P. falciparum* strains FCR3/IT4,  
332 3D7/NF54, M920 and Malayan Camp, codon-optimized for expression in mammalian cell lines, were  
333 used (Renn *et al.*, 2021). The DBL3X, DBL5 $\epsilon$  and ID1-ID2 domain sequences were amplified from  
334 these plasmids (Figure 1 – Figure supplement 1), using specific primers containing *AflIII* and *XhoI*  
335 restriction sites (Supplementary Table 1).

336 The amplified sequences were cloned into modified pcDNA3.1 expression vectors. The vectors  
337 contained a Kozak consensus sequence, followed by a start codon and a sequence encoding a human  
338 serum albumin signal peptide (MKWVTFISLLFLFSSAYSILK). These elements were followed by a  
339 multiple cloning site, including the restriction sites *AflIII* and *XhoI*, and an SG4S linker to separate the  
340 detection tag from the cloned sequence. The four C-terminal detection tags used were GAL  
341 (CYPGQAPPGAYPGQAPPGA), TRAP (DDFLSQQPERPRDVKLA), TWIN-Strep  
342 (WSHPQFEKGGGSGGGSGGSAWSHPQFEK) and WASP (CPDYRPYDWASPDYRD) (Jahnmatz *et al.*, 2016;  
343 Jahnmatz *et al.*, 2021), each followed by a stop codon. The IT4 ID1-ID2 antigen was produced in four  
344 versions, tagged with each of the four detection tags (Figure 1C). The remaining three ID1-ID2  
345 variants (NF54, M920, Malayan Camp) and each of the four DBL3X and DBL5 $\epsilon$  domains were each  
346 produced with a single tag only (Figure 1C).

347 The generated plasmids were transfected into FreeStyle 293-F cells (Thermo Fisher Scientific)  
348 using the FreeStyle MAX reagent. Culture supernatants were harvested by centrifugation (3,500  $\times$  g,  
349 15 min), five days after transfection. ID1-ID2-containing supernatants were buffer exchanged (20mM  
350 HEPES, pH 7.4, 1mM EDTA, 5% glucose) and the proteins purified by affinity chromatography using a  
351 HiTrap Heparin High-Performance column (GE Healthcare) and gradient elution (0-100% NaCl) with  
352 20mM HEPES pH 7.4, 1mM EDTA, 5% Glucose, 1M NaCl. Selected fractions containing ID1-ID2 were  
353 collected, and buffer exchanged into 20mM HEPES pH 6.5, 1mM EDTA, 5% Glucose for further  
354 purification by cation-exchange chromatography using HiTrap SP High-Performance columns (GE  
355 Healthcare), using a gradient elution with 20mM HEPES pH 6.5, 1mM EDTA, 5% Glucose, 1M NaCl as  
356 described above. The DBL3X and DBL5 $\epsilon$ -containing supernatants were buffer exchanged into 20 mM  
357 HEPES pH 6.5, 1mM EDTA, 5% Glucose and the proteins purified by cation-exchange  
358 chromatography using a HiTrap SP High-Performance columns (GE Healthcare), followed by size  
359 exclusion chromatography using a HiLoad 16/600 Superdex 75pg column (GE Healthcare). The  
360 purified proteins were analyzed by sodium dodecyl sulfate polyacrylamide gel electrophoresis (SDS-

361 PAGE) under reducing and non-reducing conditions ( $\pm$ DTT) followed by InstantBlue (Expedeon)  
362 staining.

363 Full-length FCR3/IT4 VAR2CSA (IT4 FL), IT4VAR09 (Non-PM IT4 FL) and the single domain  
364 PF07\_0139 DBL $\epsilon$ 4 (Non-PM DBL $\epsilon$ 4) were used as controls for some ELISAs and were expressed and  
365 purified as previously described (Larsen *et al.*, 2019; Quintana *et al.*, 2019; Stevenson *et al.*, 2015)

#### 366 *VAR2CSA-specific monoclonal antibodies*

367 The 6E2 monoclonal antibody is secreted by a hybridoma line derived from a mouse immunized  
368 with the ID1-ID2 region of the IT4 variant of VAR2CSA (unpublished data).

369 The human VAR2CSA-specific monoclonal antibodies PAM1.4, PAM2.8, PAM3.10 and PAM8.1 are  
370 secreted by Epstein-Barr virus immortalized memory B cells from PM-exposed Ghanaian women  
371 (Barfod *et al.*, 2007). PAM1.4 appears to recognize a conserved conformational and discontinuous  
372 epitope in VAR2CSA, as it reacts with the majority of native and full-length recombinant VAR2CSA  
373 variants, whereas it does not react with individual domains in VAR2CSA. PAM2.8 and PAM8.1 are  
374 reported to specifically recognizing epitopes in the DBL3X domain of some, but not all VAR2CSA  
375 variants. PAM3.10 recognizes a linear epitope (GKNEKCKINSKS) present in the DBL5 $\epsilon$  domain of  
376 some, but not all VAR2CSA variants.

#### 377 *Detection reagents*

378 The following reagents were used to detect the peptide-tags on the recombinant VAR2CSA  
379 antigens: rat anti-GAL monoclonal antibody (mAb), mouse anti-TRAP mAb, StrepTactin (to detect the  
380 TWIN tag) and mouse anti-WASP mAb. For the FluoroSpot assay, the same but fluorophore-  
381 conjugated reagents were used: anti-GAL-490 mAb, mouse anti-TRAP-550 mAb, StrepTactin-380 and  
382 mouse anti-WASP-640 mAb. Mabtech AB, Sweden produced all the monoclonal antibodies. The  
383 StrepTactin was purchased from IBA-LifeSciences, Germany either as an unconjugated product (to  
384 then couple the 380 fluorophore) or as an HRP-conjugate to be used in ELISA.

#### 385 *Enzyme-linked immunosorbent assays*

386 The specificity of the detection reagents and of the VAR2CSA-specific antibodies listed above  
387 against the peptide-tagged VAR2CSA antigens were assessed by ELISA. Briefly, flat-bottomed Nunc  
388 MaxiSorp high protein-binding capacity 96-well plates (Thermo Fisher Scientific) were coated  
389 overnight at 4°C with the recombinant antigens (0.1 $\mu$ g/well) prepared in PBS. Coating solution was  
390 then removed, and each well was blocked with dilution buffer (PBS, 0.5M NaCl, 1% Triton X-100, 1%  
391 BSA, 0.02 mM phenol red) for one hour at room temperature. After three washes (PBS, 0.5 M NaCl,  
392 1% Triton X-100), 50  $\mu$ L of primary antibody solution (at 10  $\mu$ g/mL) or dilution buffer were added to  
393 each well and incubated for one hour at room temperature. After three washes, the plates were

394 incubated with either anti-human-HRP (Dako), anti-rat-HRP (Invitrogen), anti-mouse-HRP (Dako)  
395 secondary Abs or StrepTactin-HRP (IBA-LifeSciences, Germany), depending on the origin of the  
396 primary Ab, for one hour at room temperature. Plates were then washed three times and developed  
397 by addition of 3,3',5,5'-tetramethylbenzidine/TMB PLUS2 (Kementec, Denmark) for five minutes. The  
398 reaction was then stopped adding 0.2M H<sub>2</sub>SO<sub>4</sub> solution followed by optical density (OD)  
399 measurement at 450 nm on a HiPo MPP-96 microplate photometer (BioSan Medical-Biological  
400 Research and Technologies, Latvia).

#### 401 *Cell culture and PBMC samples*

402 Frozen aliquots of the cell lines secreting the VAR2CSA-specific antibodies described above were  
403 thawed, washed and grown in culture media (RPMI 1640, 10% heat-inactivated FBS, 100U/ml  
404 penicillin, 100 µg/mL streptomycin, 4 mM L-glutamine). Hybridomas and EBV-immortalized human  
405 B-cell lines were seeded in T25 flasks at cell densities between 50,000-500,000 and 250,000-  
406 1,000,000 cells/mL, respectively and cultured at 37°C and 5% CO<sub>2</sub> until used in the FluoroSpot assay  
407 when viability (>90%) and cell densities were counted and adjusted using a hemocytometer after  
408 staining with trypan blue.

409 Ficoll density centrifugation was used to isolate PBMC from blood samples previously collected  
410 from individuals living in a malaria endemic area (Ghana). Five days before the FluoroSpot assay was  
411 performed, PBMC were thawed and cultured at 37°C and 5% CO<sub>2</sub> in the presence of 1 µg/mL R848  
412 and 10 ng/mL of recombinant interleukin (IL) 2 (both from Mabtech).

#### 413 *Reverse FluoroSpot Assay*

414 The FluoroSpot assay was performed as previously described (Jahnmatz et al., 2016, 2020, 2021)  
415 with small modifications. Low fluorescent 96-well polyvinylidene fluoride sterile plates (Millipore,  
416 Bedford, MA, USA) were pre-wetted with 20 µL/well of freshly prepared 40% ethanol solution for  
417 one minute. Ethanol was then thoroughly washed (five times) with 200 µL/well H<sub>2</sub>O and one time  
418 with PBS. Next, 100 µL of either goat anti-mouse IgG (for 6E2 hybridoma cells) or mouse anti-human  
419 IgG (for EBV-immortalized human B cells) specific for the Fc region (Mabtech) diluted in sterile PBS at  
420 15 µg/mL were added to wells followed by incubation at 4°C for 24 hours. The next day, antibody  
421 solution was removed, and wells were washed five times with 200 µL/well PBS followed by blocking  
422 with 200 µL/well of cell culture medium for one hour at room temperature. The blocking solution  
423 was removed and replaced by 100 µL/well of a thoroughly washed ASC suspension containing 125  
424 (6E2 and EBV-immortalized cell lines) or 250,000 cells (PBMC). The plates were then incubated for  
425 24 hours at 37°C with 5% CO<sub>2</sub>. Cell suspension was then removed, and the wells washed three times  
426 with 200 µL/well PBS, followed by the addition of 100 µL of peptide-tagged VAR2CSA antigens  
427 diluted in PBS 0.1% BSA (at 1 µg/mL) and incubation for one hour at room temperature. Plates were



428 then washed again three times with PBS and 100 $\mu$ L of fluorophore-conjugated detection reagents  
429 were added (anti-GAL, 490, anti-TRAP-550, Strep-Tactin-380 and anti-WASP-640), all diluted to  
430 0.5  $\mu$ g/mL in PBS 0.1% BSA. The frequency of total IgG-producing cells when using PBMC samples  
431 was determined using 25,000 pre-stimulated PBMC in two separate duplicate wells. To detect IgG-  
432 producing cells, 100  $\mu$ L/well of biotinylated mAb anti-human IgG (Mabtech) diluted to 0.5  $\mu$ g/mL,  
433 were added followed by Strep-Tactin-550. After a final three washes with PBS, 50  $\mu$ L/well of  
434 Fluorescent enhancer II (Mabtech) were added followed by incubation for 10 minutes at room  
435 temperature. Enhancer was then removed, and the underdrain of the plate was carefully removed.  
436 The wells were left to dry protected from light at room temperature. When the 6E2 mouse  
437 hybridoma cell line was tested, a blocking step prior to antigen addition was included, to block the  
438 coating goat anti-mouse antibody from binding the peptide detection antibodies. 200  $\mu$ L/well  
439 filtered mouse serum (Innovative Research, USA) diluted in PBS (1:5) was used for 2 hours at room  
440 temperature followed by three washes with 200  $\mu$ L/well PBS. Data was then immediately acquired  
441 using the Mabtech IRIS reader. For each well, images in each detection channel (LED490, LED550,  
442 LED380 and LED640) were taken and number of spots per well and relative spot volume (RSV) were  
443 automatically counted using the Apex software version 1.1.7. Percentages of single, double, triple  
444 and quadruple positive spots were also calculated.

#### 445 *Data analysis*

446 Statistical analyses were performed using GraphPad Prism version 6 (GraphPad Software, La Jolla,  
447 CA). The Friedman test was used to detect differences in the mean across experimental groups  
448 followed by Dunn's multiple comparison test. An alpha of 0.05 was used.

449 **Acknowledgements**

450 The research was supported by the Danish International Development Agency (DANIDA) grant  
451 MAVARECA-II (17-02-KU) ) and by the National Institutes of Health (NIH) under award number  
452 R21AI164147-01. NA was supported by a BSU3-UG PhD studentship. MdPQ received funding from  
453 the European Union's Horizon 2020 research and innovation program under the Marie Skłodowska-  
454 Curie grant agreement No. 101028915.

455 The authors thank Morten Agertoug Nielsen (University of Copenhagen, Denmark) for providing  
456 the 6E2 mouse hybridoma cell line, and Jonathan Renn and Patrick E. Duffy (National Institute of  
457 Allergy and Infectious Diseases, NIH, USA) for the plasmids encoding the full-length VAR2CSA 3D7,  
458 M920 and Malayan Camp allelic variants.

459 *Competing interests*

460 PJ and NA are employees of Mabtech AB, the manufacturer of the IRIS instrument and several of  
461 the analytical reagents used in the study. The other authors declare not to have any conflicts of  
462 interest associated with this manuscript.

463 **References**

- 464 Adam A, Woda M, Kounlavouth S, Rothman AL, Jarman RG, Cox JH, Ledgerwood JE, Gromowski GD,  
465 Currier JR, Friberg H, Mathew A. 2018. Multiplexed FluoroSpot for the analysis of Dengue virus-  
466 and Zika virus-specific and cross-reactive memory B cells. *Journal of Immunology* **201**:3804-3814.  
467 DOI: 10.4049/jimmunol.1800892
- 468 Barfod L, Bernasconi NL, Dahlback M, Jarrossay D, Andersen PH, Salanti A, Ofori MF, Turner L,  
469 Resende M, Nielsen MA, Theander TG, Sallusto F, Lanzavecchia A, Hviid L. 2007. Human  
470 pregnancy-associated malaria-specific B cells target polymorphic, conformational epitopes in  
471 VAR2CSA. *Molecular Microbiology* **63**:335-347. DOI: 10.1111/j.1365-2958.2006.05503.x
- 472 Barfod L, Dobrilovic T, Magistrado P, Khunrae P, Viwami F, Bruun J, Dahlbäck M, Bernasconi NL, Fried  
473 M, John D, Duffy PE, Salanti A, Lanzavecchia A, Lim CT, Ndam NT, Higgins MK, Hviid L. 2010.  
474 Chondroitin sulfate A-adhering *Plasmodium falciparum*-infected erythrocytes express  
475 functionally important antibody epitopes shared by multiple variants. *Journal of Immunology*  
476 **185**:7553-7561. DOI: 10.4049/jimmunol.1002390
- 477 Bockhorst J, Lu F, Janes JH, Keebler J, Gamain B, Awadalla P, Su XZ, Samudrala R, Jojic N, Smith JD.  
478 2007. Structural polymorphism and diversifying selection on the pregnancy malaria vaccine  
479 candidate VAR2CSA. *Molecular and Biochemical Parasitology* **155**:103-112. DOI:  
480 Bull PC, Lowe BS, Kortok M, Molyneux CS, Newbold CI, Marsh K. 1998. Parasite antigens on the  
481 infected red cell are targets for naturally acquired immunity to malaria. *Nature Medicine* **4**:358-  
482 360. DOI:
- 483 Clausen TM, Christoffersen S, Dahlback M, Langkilde AE, Jensen KE, Resende M, Agerbaek MO,  
484 Andersen D, Berisha B, Ditlev SB, Pinto VV, Nielsen MA, Theander TG, Larsen S, Salanti A. 2012.  
485 Structural and functional insight into how the *Plasmodium falciparum* VAR2CSA protein mediates  
486 binding to chondroitin sulfate A in placental malaria. *Journal of Biological Chemistry* **287**:23332-  
487 23345. DOI: 10.1074/jbc.M112.348839

- 488 Cohen S, McGregor IA, Carrington S. 1961. Gamma-globulin and acquired immunity to human  
489 malaria. *Nature* **192**:733-737. DOI:
- 490 Czerkinsky CC, Nilsson LA, Nygren H, Ouchterlony O, Tarkowski A. 1983. A solid-phase enzyme-linked  
491 immunospot (ELISPOT) assay for enumeration of specific antibody-secreting cells. *Journal of*  
492 *Immunological Methods* **65**:109-121. DOI: 0022-1759(83)90308-3 [pii]
- 493 Doritchamou JY, Herrera R, Aebig JA, Morrison R, Nguyen V, Reiter K, Shimp R, Shiloach J, Macdonald  
494 NJ, Narum DL, Fried M, Duffy PE. 2016. VAR2CSA domain-specific analysis of naturally acquired  
495 functional antibodies to *P. falciparum* placental malaria. *Journal of Infectious Diseases* **214**:577-  
496 586. DOI:
- 497 Doritchamou JY, Renn JP, Jenkins B, Fried M, Duffy PE. 2022. A single full-length VAR2CSA  
498 ectodomain variant purifies broadly neutralizing antibodies against placental malaria isolates.  
499 *Elife* **11**:e76264. DOI: 10.7554/eLife.76264
- 500 Fried M, Nosten F, Brockman A, Brabin BT, Duffy PE. 1998. Maternal antibodies block malaria.  
501 *Nature* **395**:851-852. DOI:
- 502 Hadjilaou A, Green AM, Coloma J, Harris E. 2015. Single-cell analysis of B cell/antibody cross-  
503 reactivity using a novel multicolor FluoroSpot assay. *Journal of Immunology* **195**:3490-3496. DOI:  
504 10.4049/jimmunol.1500918
- 505 Hviid L. 2005. Naturally acquired immunity to *Plasmodium falciparum* malaria in Africa. *Acta Tropica*  
506 **95**:270-275. DOI:
- 507 Hviid L, Jensen AT. 2015. PfEMP1 - A parasite protein family of key importance in *Plasmodium*  
508 *falciparum* malaria immunity and pathogenesis. *Advances in Parasitology* **88**:51-84. DOI:  
509 10.1016/bs.apar.2015.02.004
- 510 Hviid L, Lavstsen T, Jensen AT. 2018. A vaccine targeted specifically to prevent cerebral malaria - is  
511 there hope? *Expert Rev Vaccines* **17**:565-567. DOI: 10.1080/14760584.2018.1488591

- 512 Jahnmatz M, Kesa G, Netterlid E, Buisman AM, Thorstensson R, Ahlborg N. 2013. Optimization of a  
513 human IgG B-cell ELISpot assay for the analysis of vaccine-induced B-cell responses. *Journal of*  
514 *Immunological Methods* **391**:50-59. DOI: 10.1016/j.jim.2013.02.009
- 515 Jahnmatz P, Bengtsson T, Zuber B, Farnert A, Ahlborg N. 2016. An antigen-specific, four-color, B-cell  
516 FluoroSpot assay utilizing tagged antigens for detection. *Journal of Immunological Methods*  
517 **433**:23-30. DOI: 10.1016/j.jim.2016.02.020
- 518 Jahnmatz P, Sundling C, Makower B, Sonden K, Farnert A, Ahlborg N. 2020. Multiplex analysis of  
519 antigen-specific memory B cells in humans using reversed B-cell FluoroSpot. *Journal of*  
520 *Immunological Methods* **478**:112715. DOI: 10.1016/j.jim.2019.112715
- 521 Jahnmatz P, Sundling C, Yman V, Widman L, Asghar M, Sonden K, Stenstrom C, Smedman C, Ndungu  
522 F, Ahlborg N, Farnert A. 2021. Memory B-cell responses against merozoite antigens after acute  
523 *Plasmodium falciparum* malaria, assessed over one year using a novel multiplexed fluoroSpot  
524 assay. *Front Immunol* **11**:619398. DOI: 10.3389/fimmu.2020.619398
- 525 Jensen ATR, Magistrado PA, Sharp S, Joergensen L, Lavstsen T, Chiacchiuini A, Salanti A, Vestergaard  
526 LS, Lusingu JP, Hermsen R, Sauerwein R, Christensen J, Nielsen MA, Hviid L, Sutherland C,  
527 Staalsoe T, Theander TG. 2004. *Plasmodium falciparum* associated with severe childhood malaria  
528 preferentially expresses PfEMP1 encoded by Group A var genes. *Journal of Experimental*  
529 *Medicine* **199**:1179-1190. DOI:
- 530 Larsen MD, Quintana MDP, Ditlev SB, Bayarri-Olmos R, Ofori MF, Hviid L, Garred P. 2019. Evasion of  
531 classical complement pathway activation on *Plasmodium falciparum*-infected erythrocytes  
532 opsonized by PfEMP1-specific IgG. *Front Immunol* **9**:3088. DOI: 10.3389/fimmu.2018.03088
- 533 Lennartz F, Adams Y, Bengtsson A, Olsen RW, Turner L, Ndam NT, Ecklu-Mensah G, Moussiliou A,  
534 Ofori MF, Gamain B, Lusingu JP, Petersen JE, Wang CW, Nunes-Silva S, Jespersen JS, Lau CK,  
535 Theander TG, Lavstsen T, Hviid L, Higgins MK *et al.* 2017. Structure-guided identification of a  
536 family of dual receptor-binding PfEMP1 that is associated with cerebral malaria. *Cell Host*  
537 *Microbe* **21**:403-414. DOI: 10.1016/j.chom.2017.02.009

- 538 Mordmuller B, Sulyok M, Egger-Adam D, Resende M, de Jongh WA, Jensen MH, Smedegaard HH,  
539 Ditlev SB, Soegaard M, Poulsen L, Dyring C, Calle CL, Knoblich A, Ibanez J, Esen M, Deloron P,  
540 Ndam N, Issifou S, Houard S, Howard RF *et al.* 2019. First-in-human, randomized, double-blind  
541 clinical trial of differentially adjuvanted PAMVAC, a vaccine candidate to prevent pregnancy-  
542 associated malaria. *Clinical Infectious Diseases* **69**:1509-1516. DOI: 10.1093/cid/ciy1140
- 543 Nielsen MA, Staalsoe T, Kurtzhals JAL, Goka BQ, Doodoo D, Alifrangis M, Theander TG, Akanmori BD,  
544 Hviid L. 2002. *Plasmodium falciparum* variant surface antigen expression varies between isolates  
545 causing severe and non-severe malaria and is modified by acquired immunity. *Journal of*  
546 *Immunology* **168**:3444-3450. DOI:
- 547 Quintana MDP, Ecklu-Mensah G, Tcherniuk SO, Ditlev SB, Oleinikov AV, Hviid L, Lopez-Perez M. 2019.  
548 Comprehensive analysis of Fc-mediated IgM binding to the *Plasmodium falciparum* erythrocyte  
549 membrane protein 1 family in three parasite clones. *Scientific Reports* **9**:6050. DOI:  
550 10.1038/s41598-019-42585-0
- 551 Renn JP, Doritchamou JYA, Tentokam BCN, Morrison RD, Cowles MV, Burkhardt M, Ma R, Tolia NH,  
552 Fried M, Duffy PE. 2021. Allelic variants of full-length VAR2CSA, the placental malaria vaccine  
553 candidate, differ in antigenicity and receptor binding affinity. *Commun Biol* **4**:1309. DOI:  
554 10.1038/s42003-021-02787-7
- 555 Ricke CH, Staalsoe T, Koram K, Akanmori BD, Riley EM, Theander TG, Hviid L. 2000. Plasma  
556 antibodies from malaria-exposed pregnant women recognize variant surface antigens on  
557 *Plasmodium falciparum*-infected erythrocytes in a parity-dependent manner and block parasite  
558 adhesion to chondroitin sulphate A. *Journal of Immunology* **165**:3309-3316. DOI:
- 559 Sabchareon A, Burnouf T, Ouattara D, Attanath P, Bouharoun TH, Chantavanich P, Foucault C,  
560 Chongsuphajaisiddhi T, Druilhe P. 1991. Parasitologic and clinical human response to  
561 immunoglobulin administration in falciparum malaria. *American Journal of Tropical Medicine and*  
562 *Hygiene* **45**:297-308. DOI:

563 Salanti A, Dahlback M, Turner L, Nielsen MA, Barfod L, Magistrado P, Jensen AT, Lavstsen T, Ofori  
564 MF, Marsh K, Hviid L, Theander TG. 2004. Evidence for the involvement of VAR2CSA in  
565 pregnancy-associated malaria. *Journal of Experimental Medicine* **200**:1197-1203. DOI:  
566 10.1084/jem.20041579

567 Salanti A, Staalsoe T, Lavstsen T, Jensen ATR, Sowa MPK, Arnot DE, Hviid L, Theander TG. 2003.  
568 Selective upregulation of a single distinctly structured *var* gene in CSA-adhering *Plasmodium*  
569 *falciparum* involved in pregnancy-associated malaria. *Molecular Microbiology* **49**:179-191. DOI:  
570 Sirima SB, Richert L, Chene A, Konate AT, Champion C, Dechavanne S, Semblat JP, Benhamouda N,  
571 Bahuaud M, Loulergue P, Ouedraogo A, Nebie I, Kabore M, Kargougou D, Barry A, Ouattara SM,  
572 Boilet V, Allais F, Roguet G, Havelange N *et al.* 2020. PRIMVAC vaccine adjuvanted with  
573 Alhydrogel or GLA-SE to prevent placental malaria: a first-in-human, randomised, double-blind,  
574 placebo-controlled study. *Lancet Infectious Diseases* **20**:585-597. DOI: 10.1016/S1473-  
575 3099(19)30739-X

576 Stevenson L, Huda P, Jeppesen A, Laursen E, Rowe JA, Craig A, Streicher W, Barfod L, Hviid L. 2015.  
577 Investigating the function of F<sub>c</sub>-specific binding of IgM to *Plasmodium falciparum* erythrocyte  
578 membrane protein 1 mediating erythrocyte rosetting. *Cellular Microbiology* **17**:819-831. DOI:  
579 Trimnell AR, Kraemer SM, Mukherjee S, Phippard DJ, Janes JH, Flamoe E, Su XZ, Awadalla P, Smith JD.  
580 2006. Global genetic diversity and evolution of *var* genes associated with placental and severe  
581 childhood malaria. *Molecular and Biochemical Parasitology* **148**:169-180. DOI:  
582 Turner L, Lavstsen T, Berger SS, Wang CW, Petersen JE, Avril M, Brazier AJ, Freeth J, Jespersen JS,  
583 Nielsen MA, Magistrado P, Lusingu J, Smith JD, Higgins MK, Theander TG. 2013. Severe malaria is  
584 associated with parasite binding to endothelial protein C receptor. *Nature* **498**:502-505. DOI:  
585 10.1038/nature12216

586 WHO. 2021. World malaria report 2021. DOI:  
587  
588

589 **Figures**

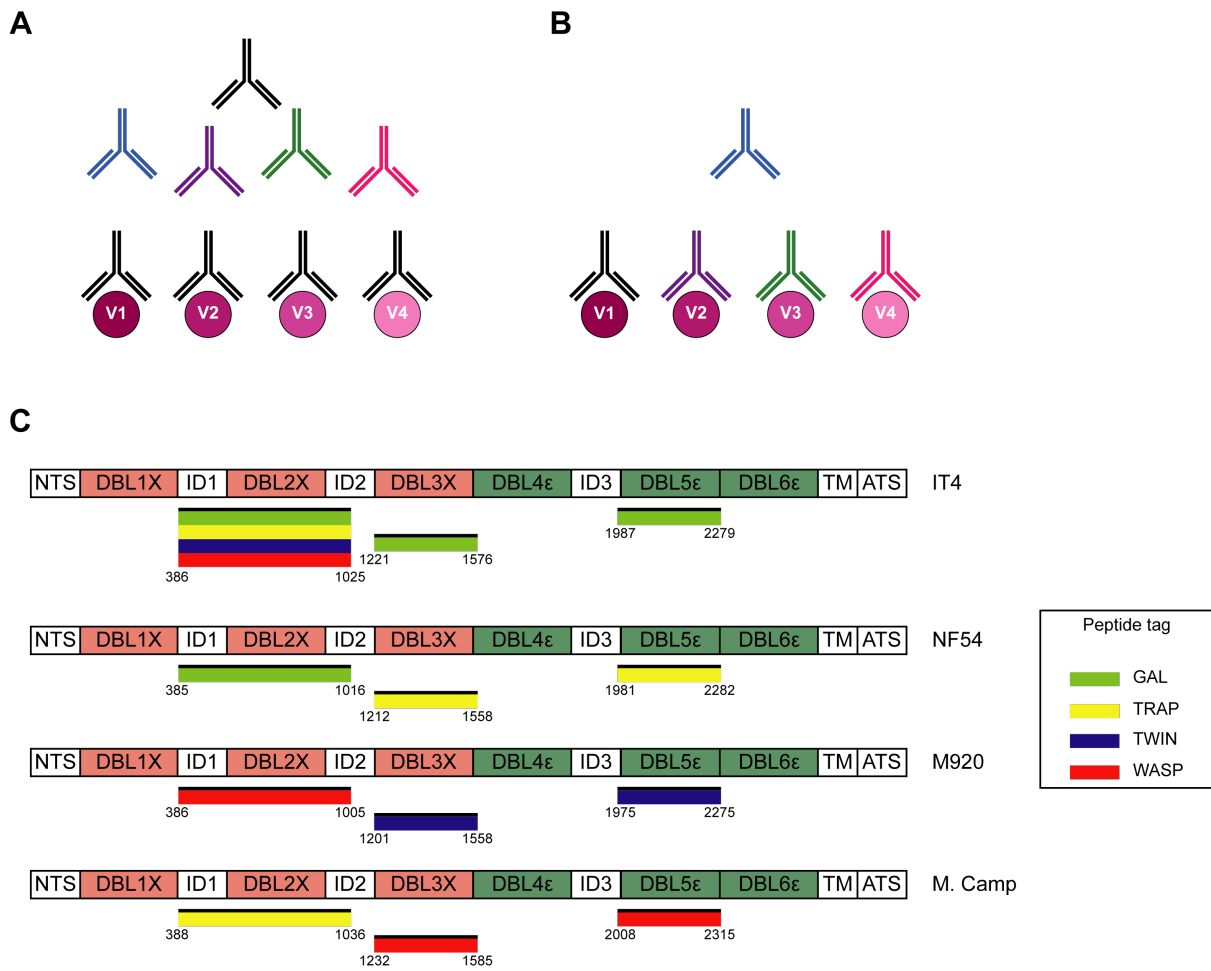

590

591 **Figure 1. Cross-reactivity in the VAR2CSA-specific response present in serum.**

592 (A) Schematic representing “true” cross-reactivity where an epitope shared among different  
 593 VAR2CSA variants (V1-V4) is recognized by a single monoclonal antibody (colored in black) present in  
 594 the polyclonal serum. (B) In “apparent” cross-reactivity a VAR2CSA polymorphic epitope is  
 595 recognized by several different variant-specific monoclonal antibodies present in serum. (C)  
 596 Schematic structure of the VAR2CSA variants included in this study, depicting the N-terminal  
 597 segment (NTS), the six Duffy binding-like (DBL) domains, the interdomain (ID) regions, the  
 598 transmembrane domain (TM) and the intracellular acidic terminal segment (ATS). The relevant  
 599 domain boundaries are indicated with amino acid positions under each schematic. The peptide-  
 600 tagged recombinant domains are also indicated under the sequence with the corresponding  
 601 fluorophore colors used for detection in the reversed FluoroSpot assay



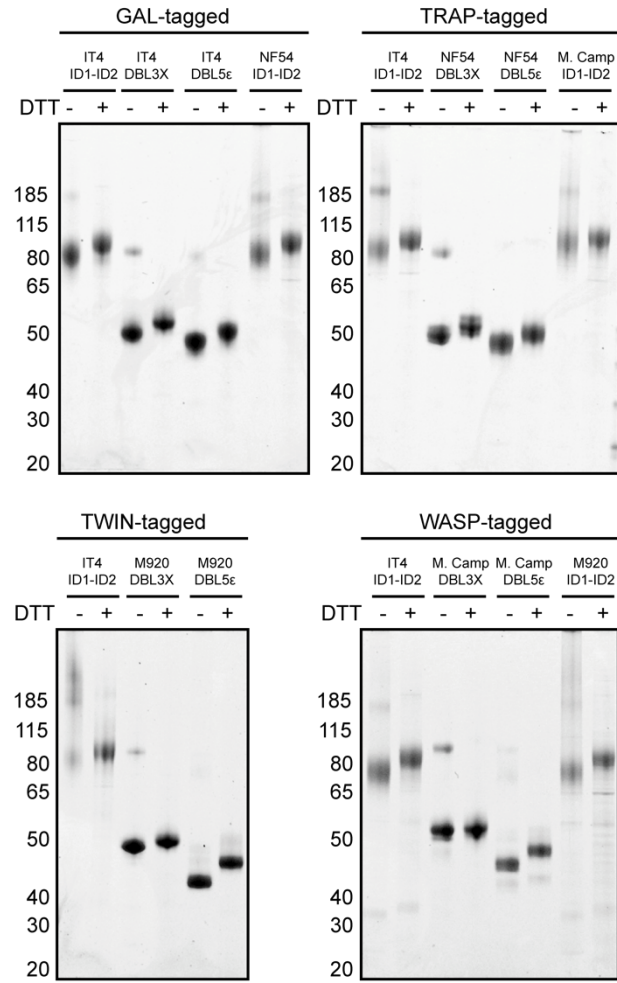

602

603 **Figure 1 – figure supplement 1.** Instant blue-stained gels of purified, recombinant peptide-tagged

604 VAR2CSA domains under reducing (+DTT) and non-reducing conditions (-DTT)

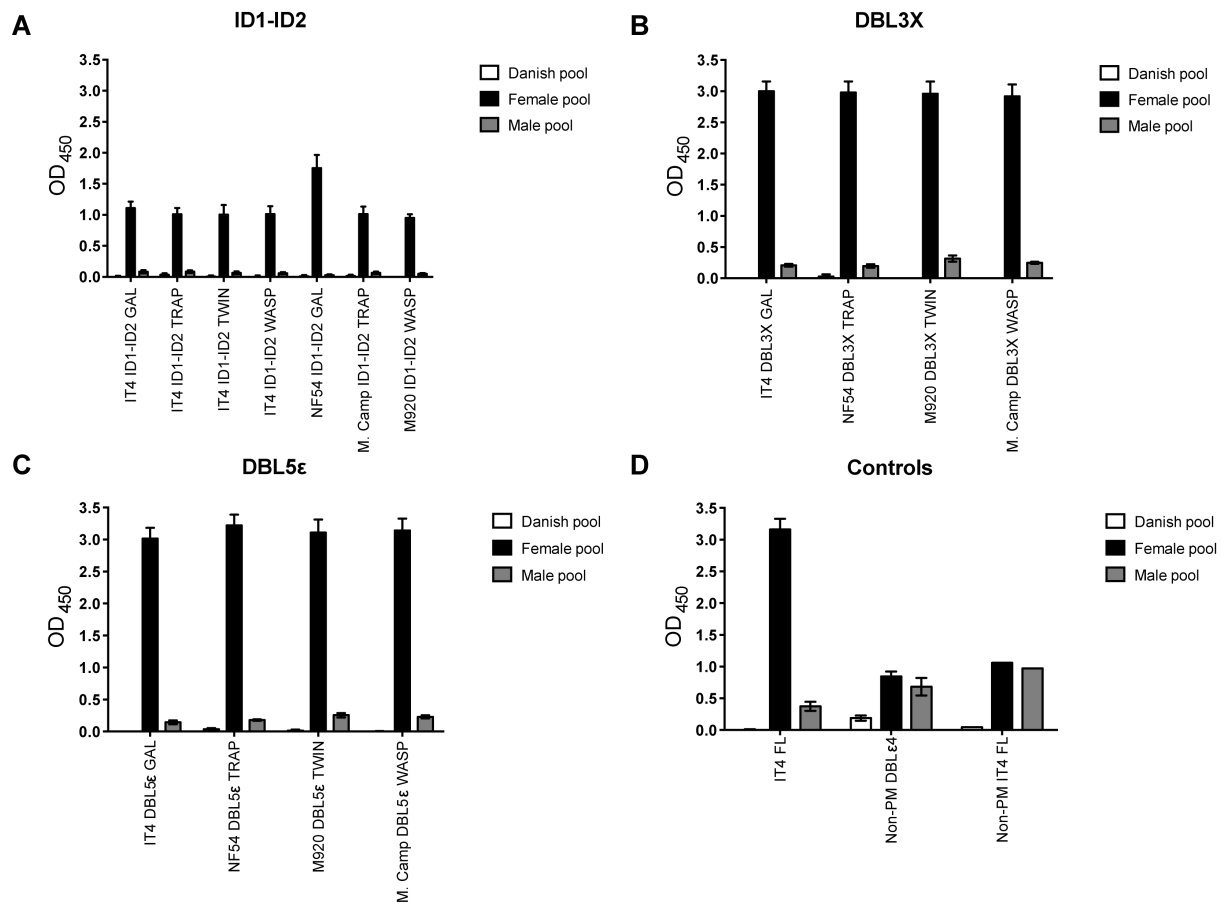

605

606 **Figure 1 – figure supplement 2.** IgG-binding to recombinant VAR2CSA domains by ELISA. IgG

607 binding of malaria-exposed (female and male pool) and malaria-naïve (Danish pool) donors to

608 immobilized recombinant proteins: (A) ID1-ID2, (B) DBL3X, (C) DBL5ε and (D) control antigens.

609 Means and standard deviations of data from three independent experiments are shown

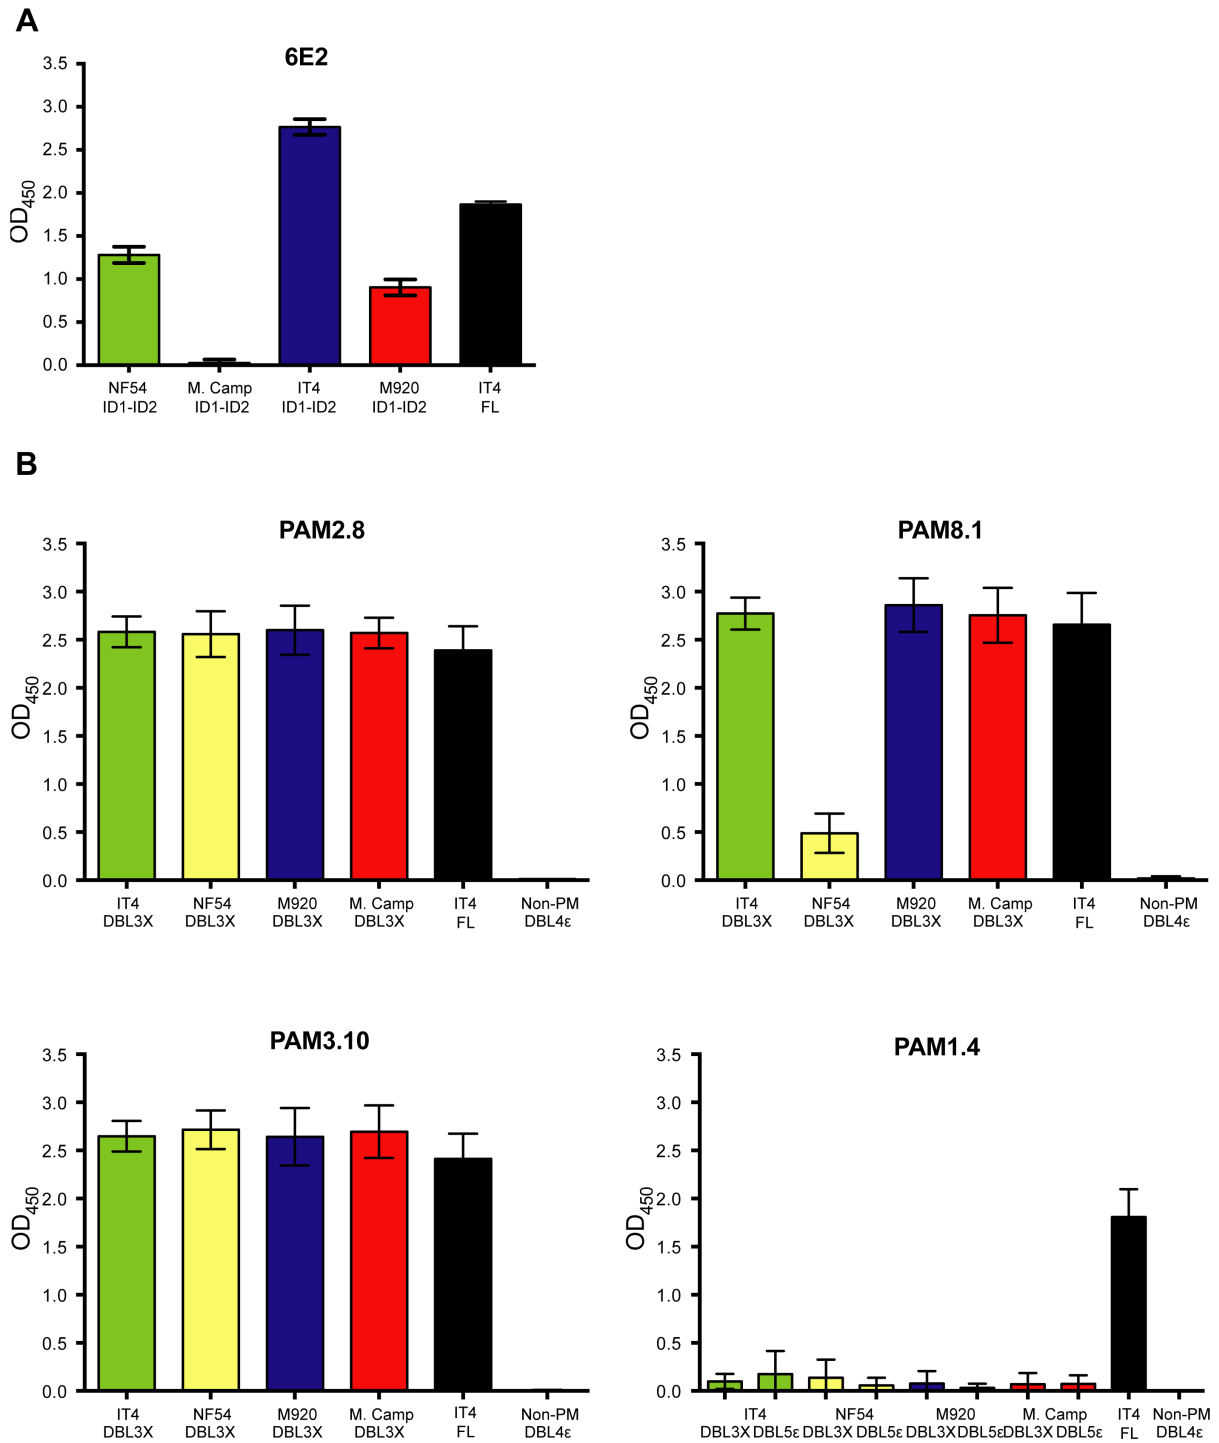

610

611 **Figure 1 – figure supplement 3. Antibody binding to recombinant VAR2CSA domains by ELISA. (A)**

612 **6E2 binding to the four ID1-ID2 variants (NF54, M. Camp, IT4 and M920) and to full-length IT4**

613 **VAR2CSA. (B) PAM2.8, PAM8.1, PAM3.10 and PAM1.4 (control) binding to the four DBL3X and DBL5ε**

614 **variants (NF54, M. Camp, IT4 and M920) and to full-length IT4 VAR2CSA. Means and standard**

615 **deviations of data from three independent experiments are shown**

616

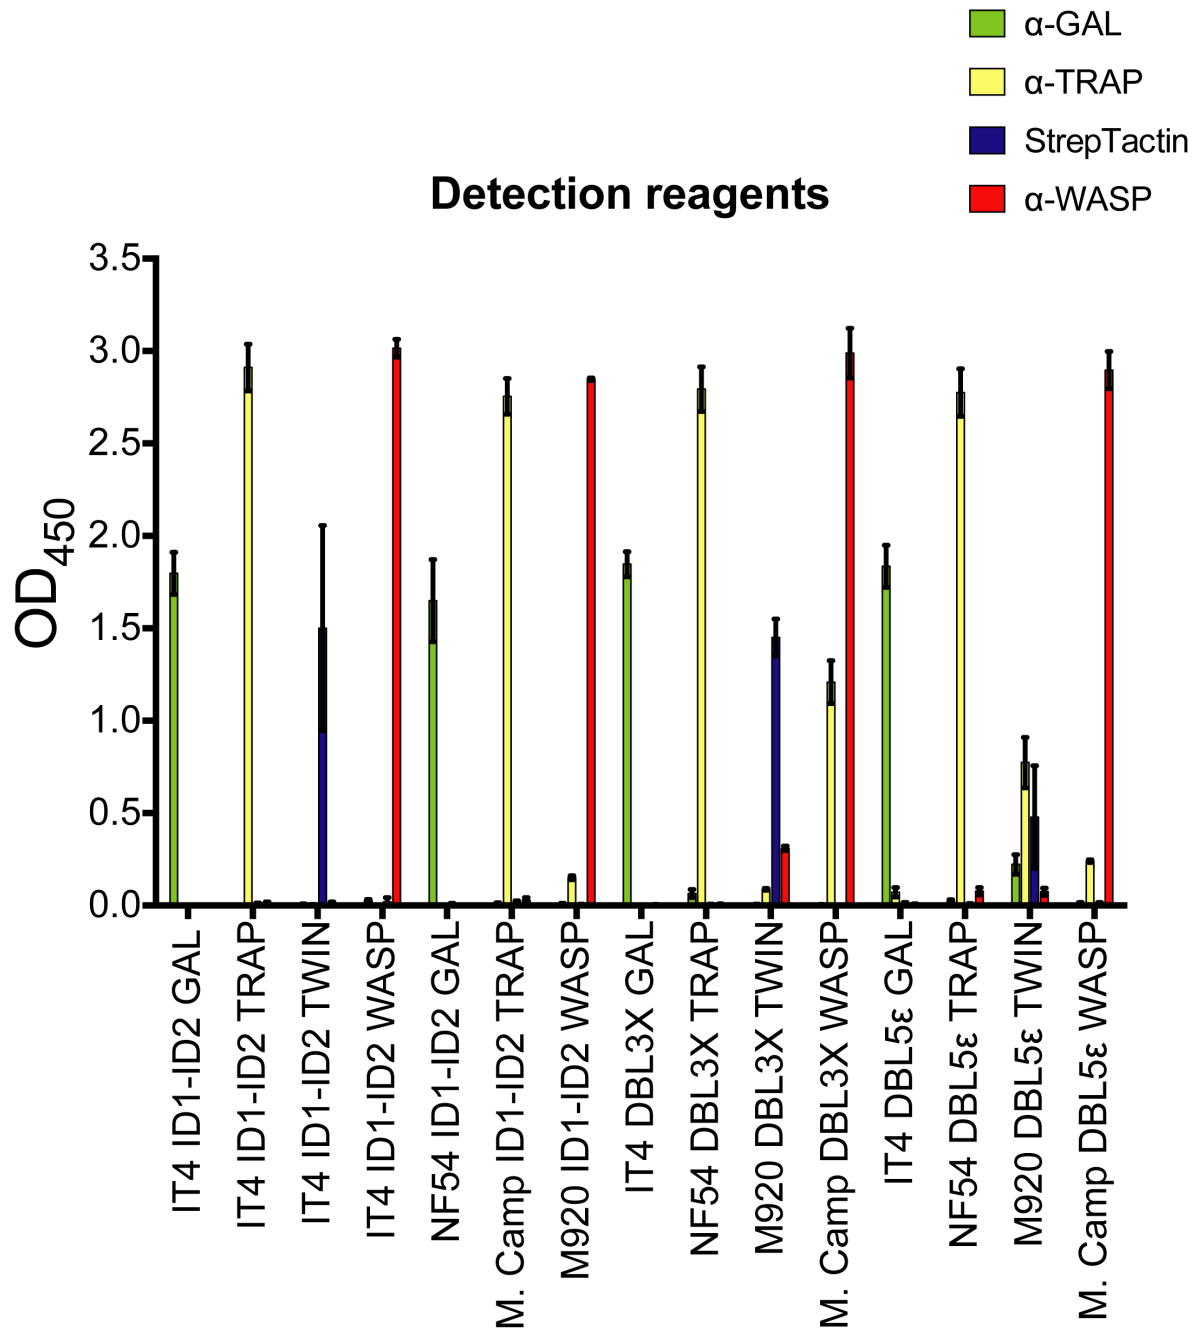

617

618 **Figure 1 – figure supplement 4.** FluoroSpot detection reagents binding to recombinant VAR2CSA  
619 domains by ELISA. Means and standard deviations of data from three independent experiments are  
620 shown

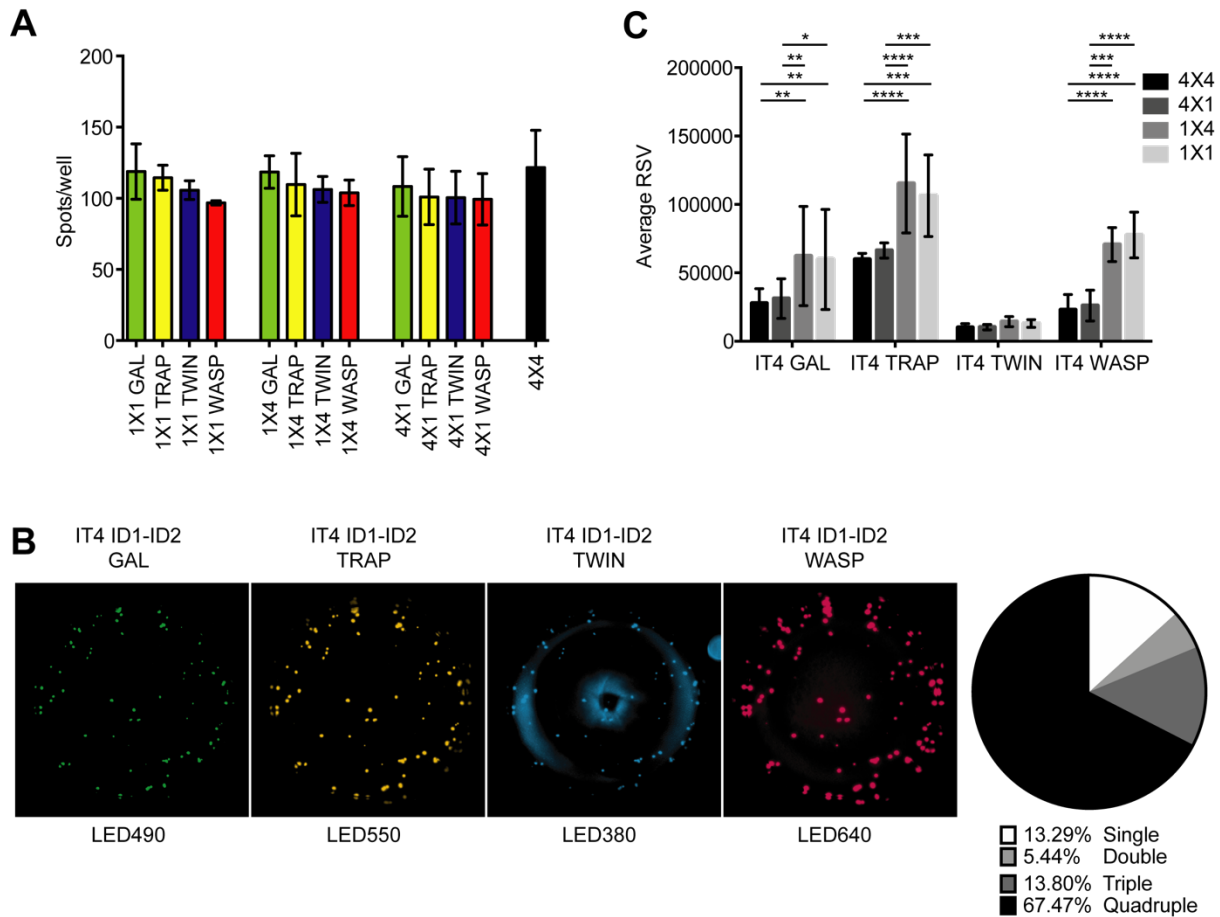

621

622 **Figure 2.** FluoroSpot analysis of the 6E2 monoclonal antibody against the IT4 ID1-ID2 domain.

623 Captured antibodies secreted by 6E2 cells were incubated with peptide-tagged IT4 ID1-ID2  
624 domains and detected using peptide-specific detection reagents. (A) Different antigen x detection  
625 reagent combinations were tested (1x1, 1x4, 4x1 and 4x4) and the number of spots/well were  
626 counted. (B) Images acquired in each detection channel corresponding to each detection reagent are  
627 presented (LED490, LED550, LED380 and LED640) for the spots detected in the 4x4 combination  
628 (black bar in A). Percentages of single, double, triple and quadruple positive spots are also  
629 presented. (C) Average relative spot volume (RSV) for all the positive spots per antigen was  
630 determined and compared between the assay combinations. Means and standard deviations of data  
631 from three independent experiments are shown.

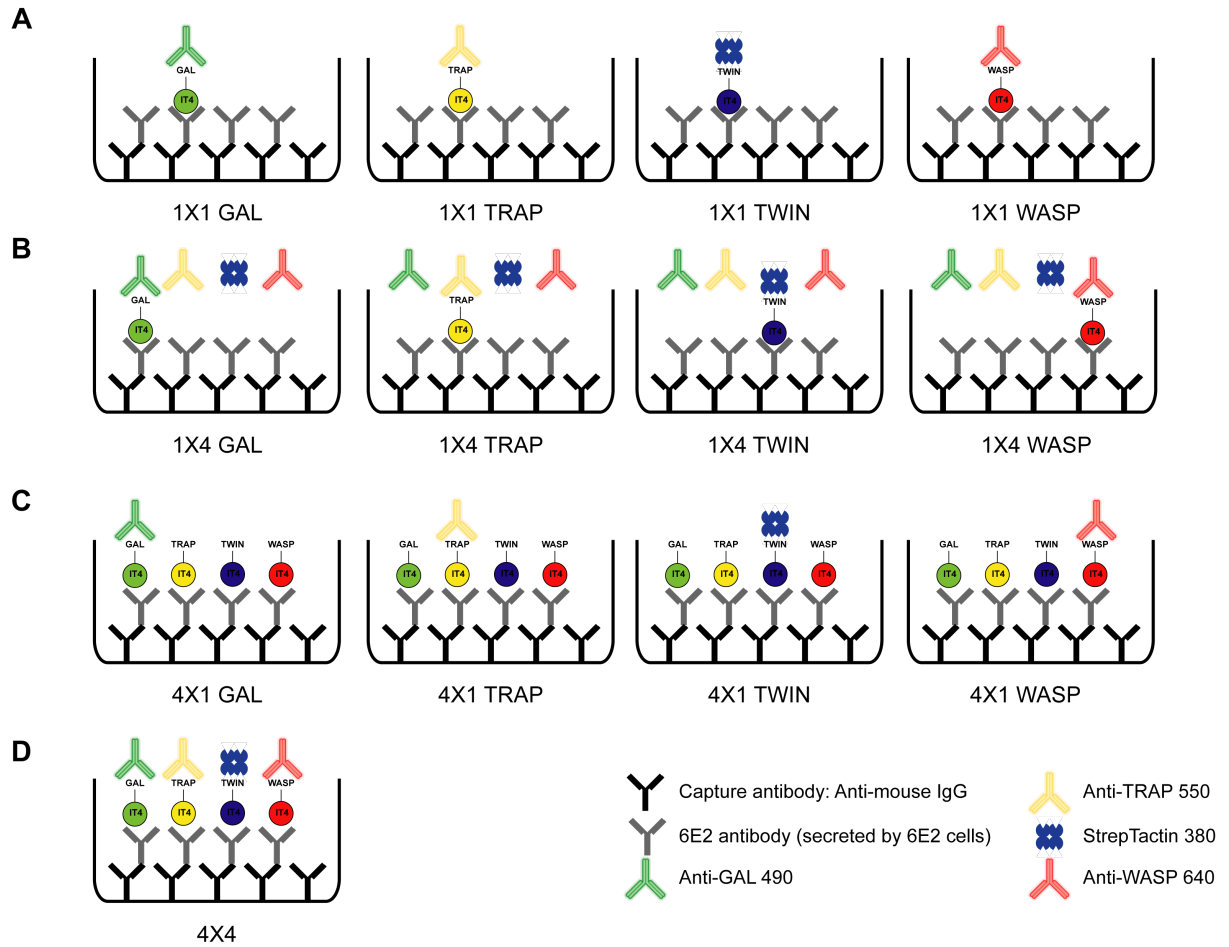

632

633 **Figure 2 – figure supplement 1.** Schematic showing the different antigen x detection reagent  
 634 combinations tested, corresponding to the data presented in Figure 2. (A) 1x1 (B) 1x4, (C) 4x1 and  
 635 (D) 4x4

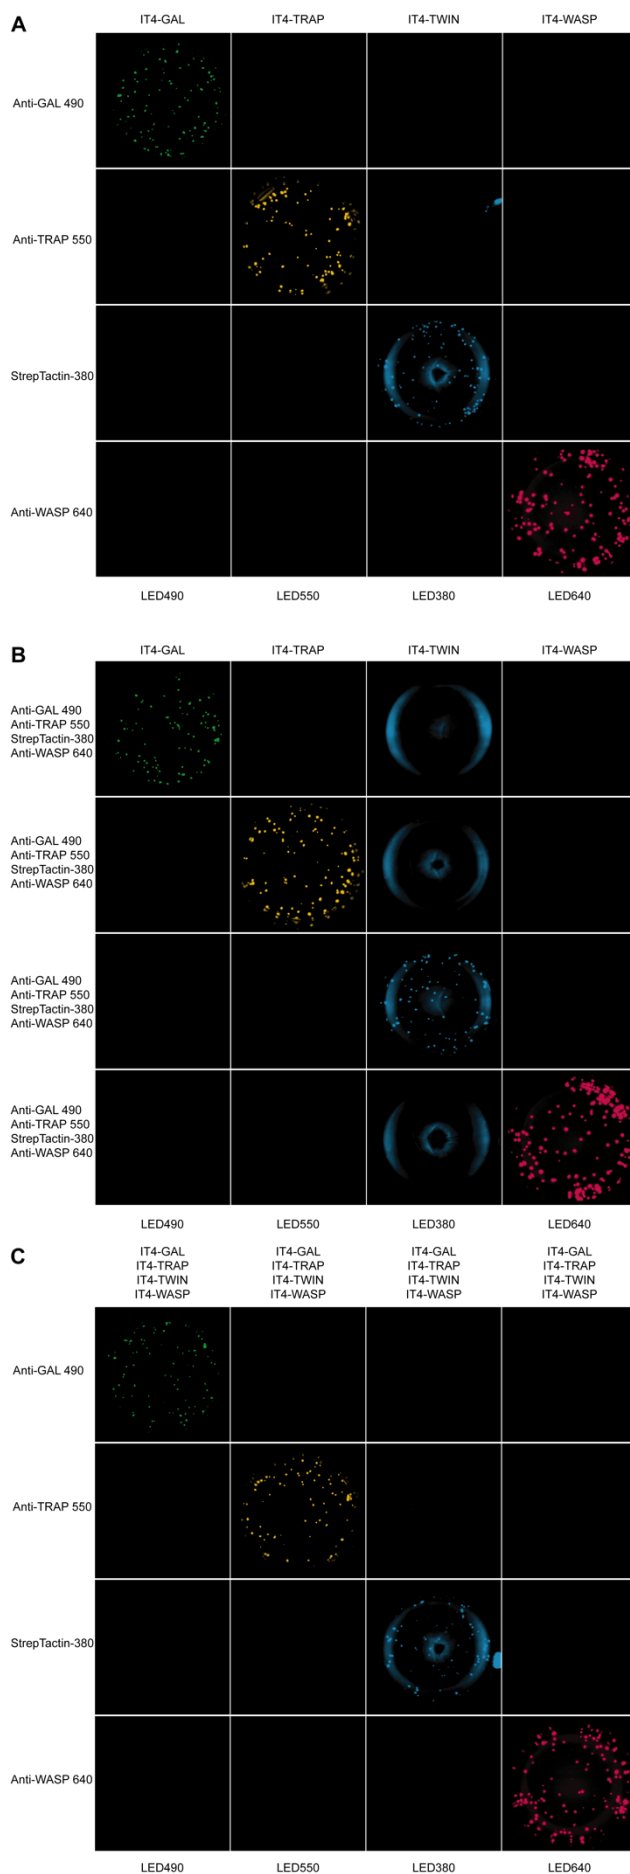

637 **Figure 2 – figure supplement 2.** Well images for the different antigen×detection reagent  
 638 combinations tested, corresponding to the schematic presented in Figure 2 – figure supplement 1  
 639 and the data presented in Figure 2. (A) 1×1, (C) 1×4 and (D) 4×1

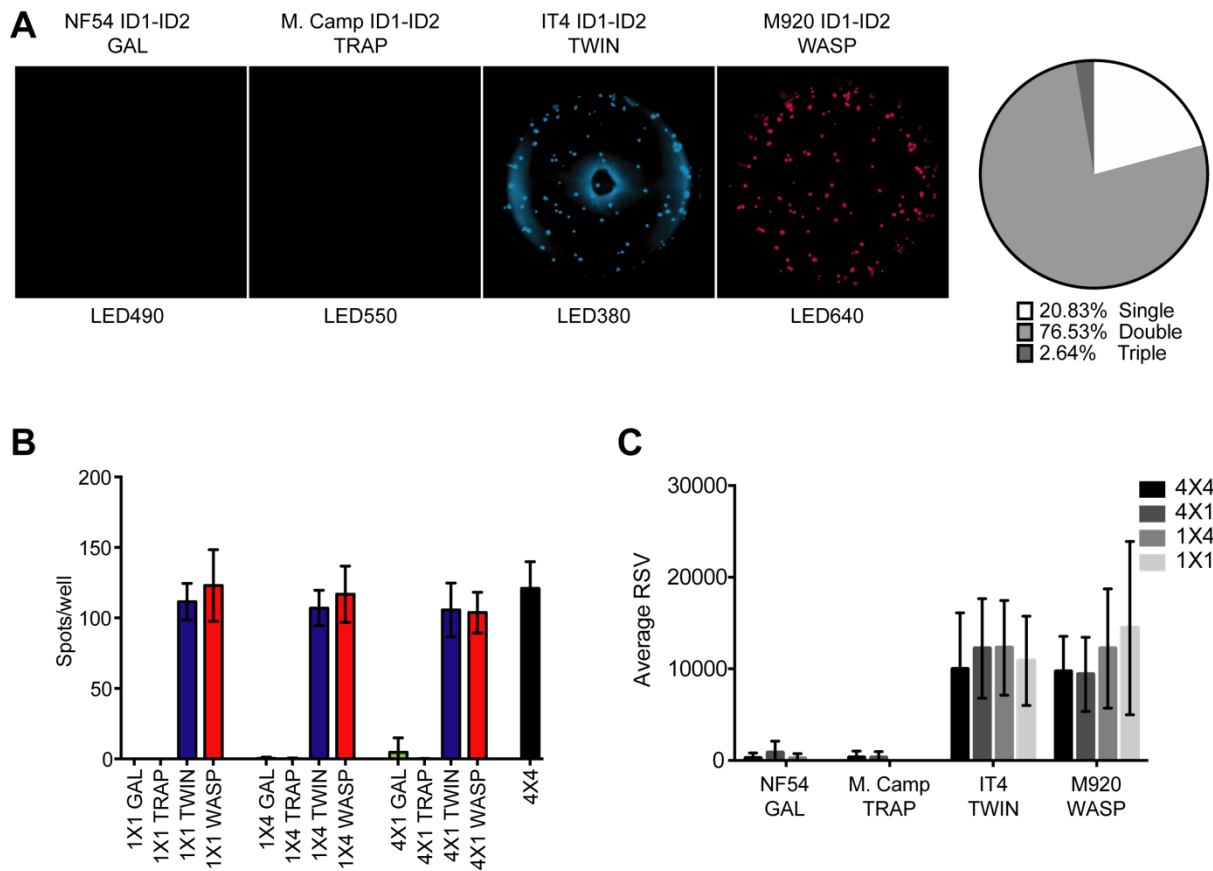

640

641 **Figure 3.** FluoroSpot analysis of the 6E2 monoclonal antibody against four peptide-tagged ID1-ID2  
 642 domain variants (NF54, M. Camp, IT4 and M920).

643 (A) Captured 6E2 antibodies secreted by 6E2 cells were incubated with all four peptide-tagged  
 644 ID1-ID2 domain variants and detected using the four peptide-specific detection reagents (multiplex  
 645 4×4). Images acquired in each detection channel are presented (LED490, LED550, LED380 and  
 646 LED640) together with the percentages of single, double, triple and quadruple positive spots. (B)  
 647 Different antigen×detection reagent combinations were tested (1×1, 1×4, 4×1 and 4×4) and the  
 648 number of spots/well were counted. (C) Average relative spot volume (RSV) for all the positive spots  
 649 per antigen was determined and compared between the assay combinations. Means and standard  
 650 deviations of data from three independent experiments are shown.



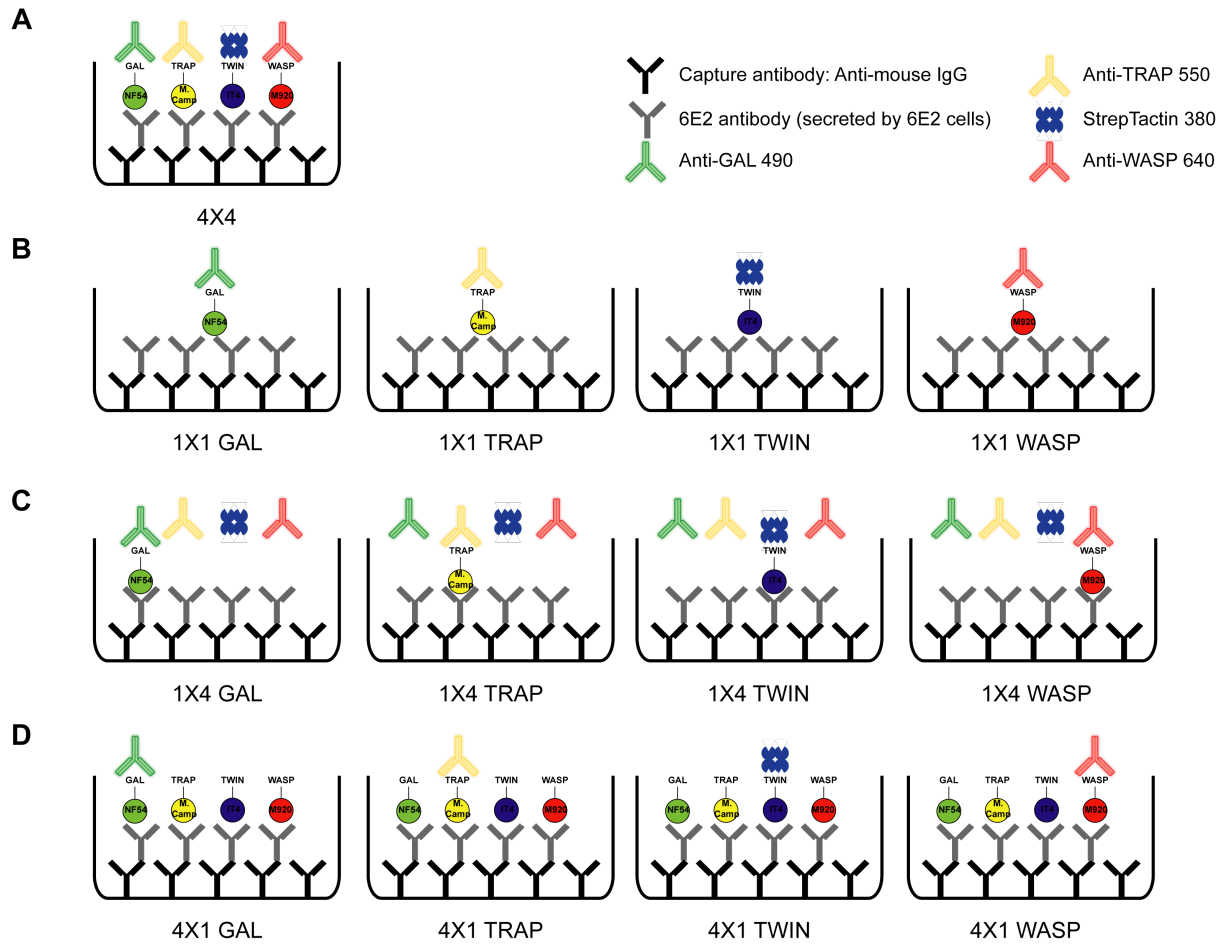

651

652

653

654

**Figure 3 – figure supplement 1.** Schematic showing the different antigen×detection reagent combinations tested, corresponding to the data presented in Figure 3. **(A)** 4×4, **(B)** 1×1, **(C)** 1×4 and **(D)** 4×1

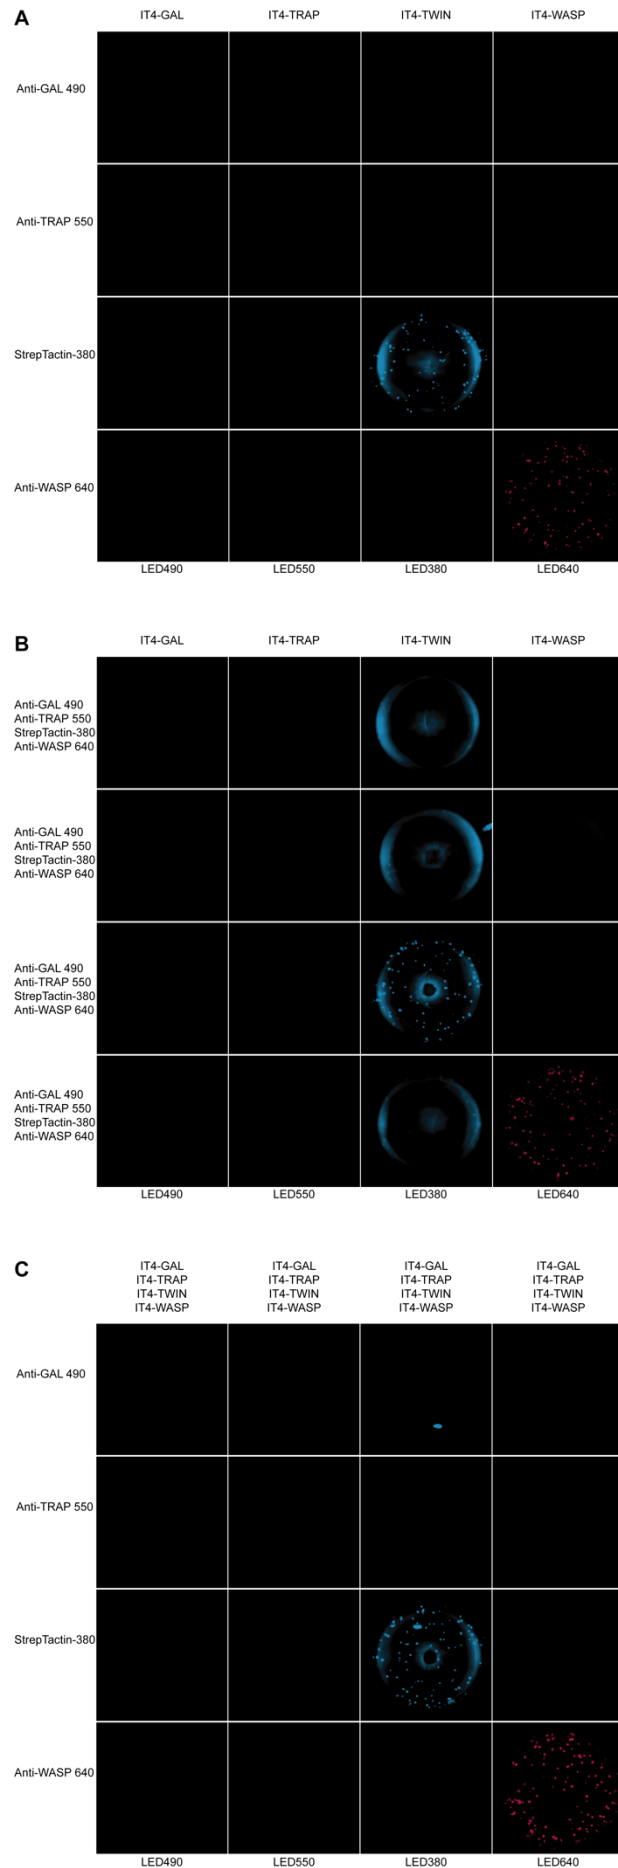

656 **Figure 3 – figure supplement 2.** Well images for the different antigen×detection reagent  
 657 combinations tested, corresponding to the schematic presented in Figure 3 – figure supplement 1  
 658 and the data presented in Figure 3. (A) 1×1, (B) 1×4 and (C) 4×1

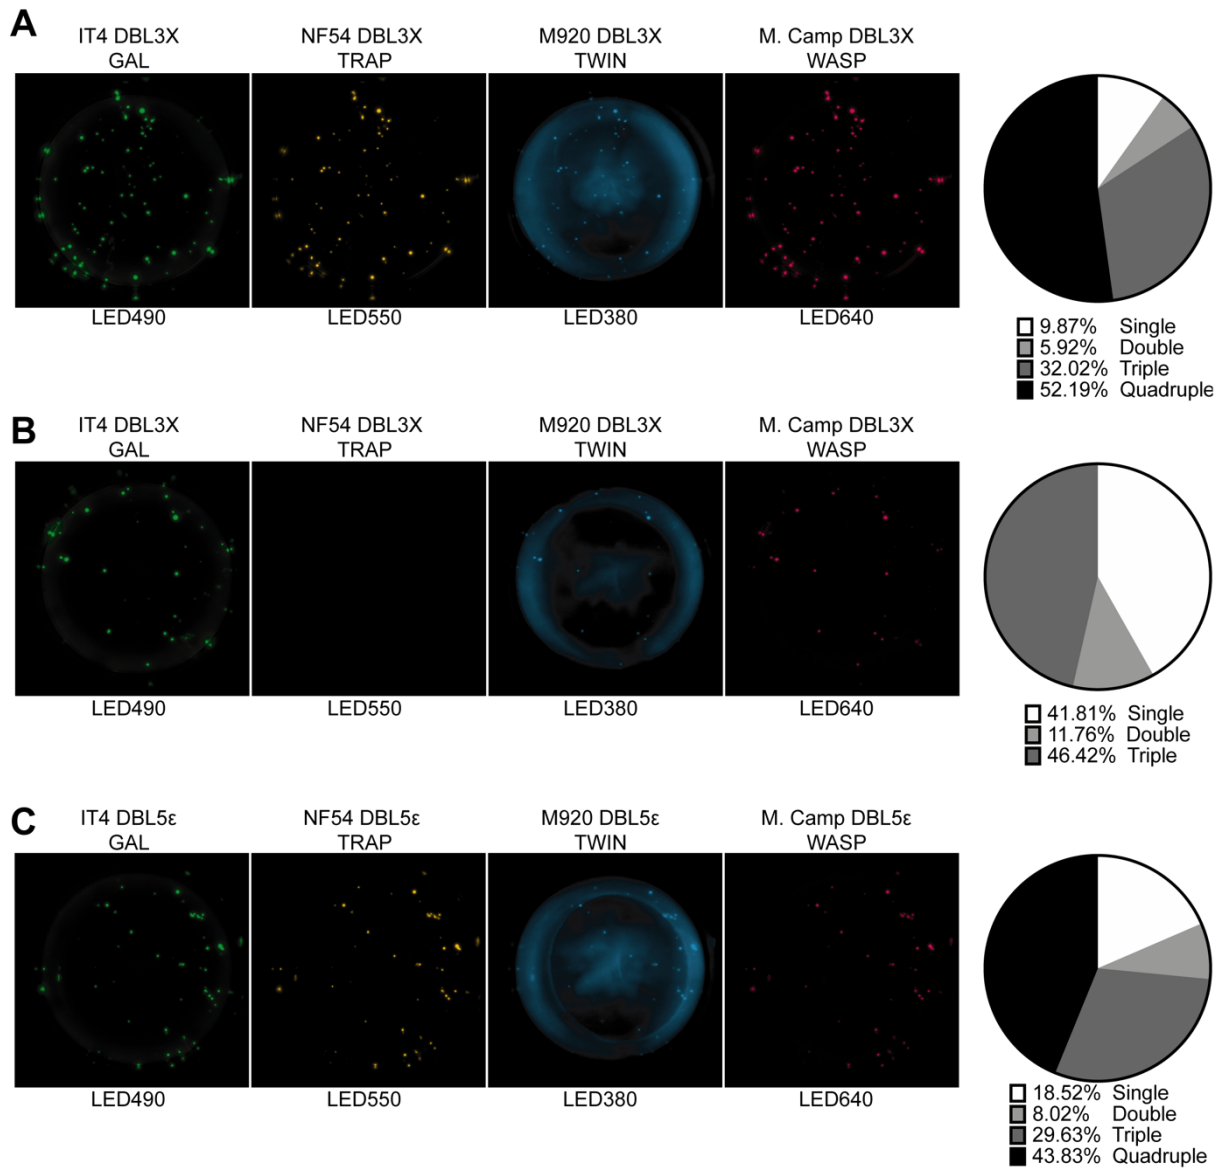

659

660 **Figure 4.** FluoroSpot analysis of the VAR2CSA specific antibodies PAM2.8, PAM8.1 and PAM3.10  
 661 against four peptide-tagged DBL3X and DBL5ε domain variants (IT4, NF54, M920 and M. Camp).

662 Captured antibodies secreted by the corresponding EBV-immortalized cell lines were incubated  
 663 with all four peptide-tagged DBL3X (PAM2.8 and PAM8.1) or DBL5ε (PAM3.10) domain variants and  
 664 detected using the four peptide-specific detection reagents (multiplex 4×4). (A) PAM2.8. (B) PAM8.1.  
 665 (C) PAM3.10. Images acquired in each detection channel are presented (LED490, LED550, LED380  
 666 and LED640) together with the percentages of single, double, triple and quadruple positive spots.

667

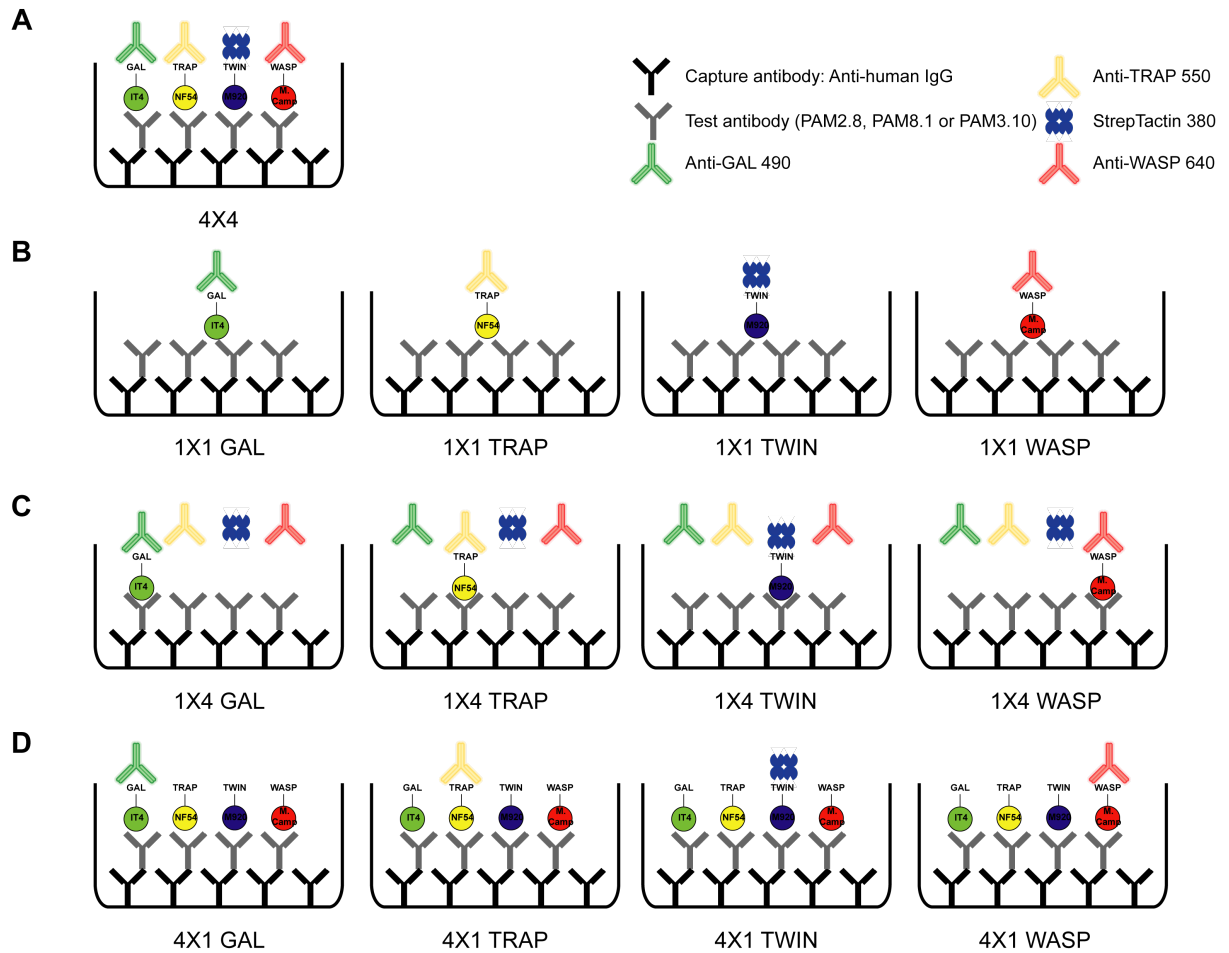

668

669

670

671

**Figure 4 – figure supplement 1.** Schematic showing the different antigen×detection reagent combinations tested (A) 4×4 (corresponding to the data presented in Figure 4), (B) 1×1, (C) 1×4 and (D) 4×1

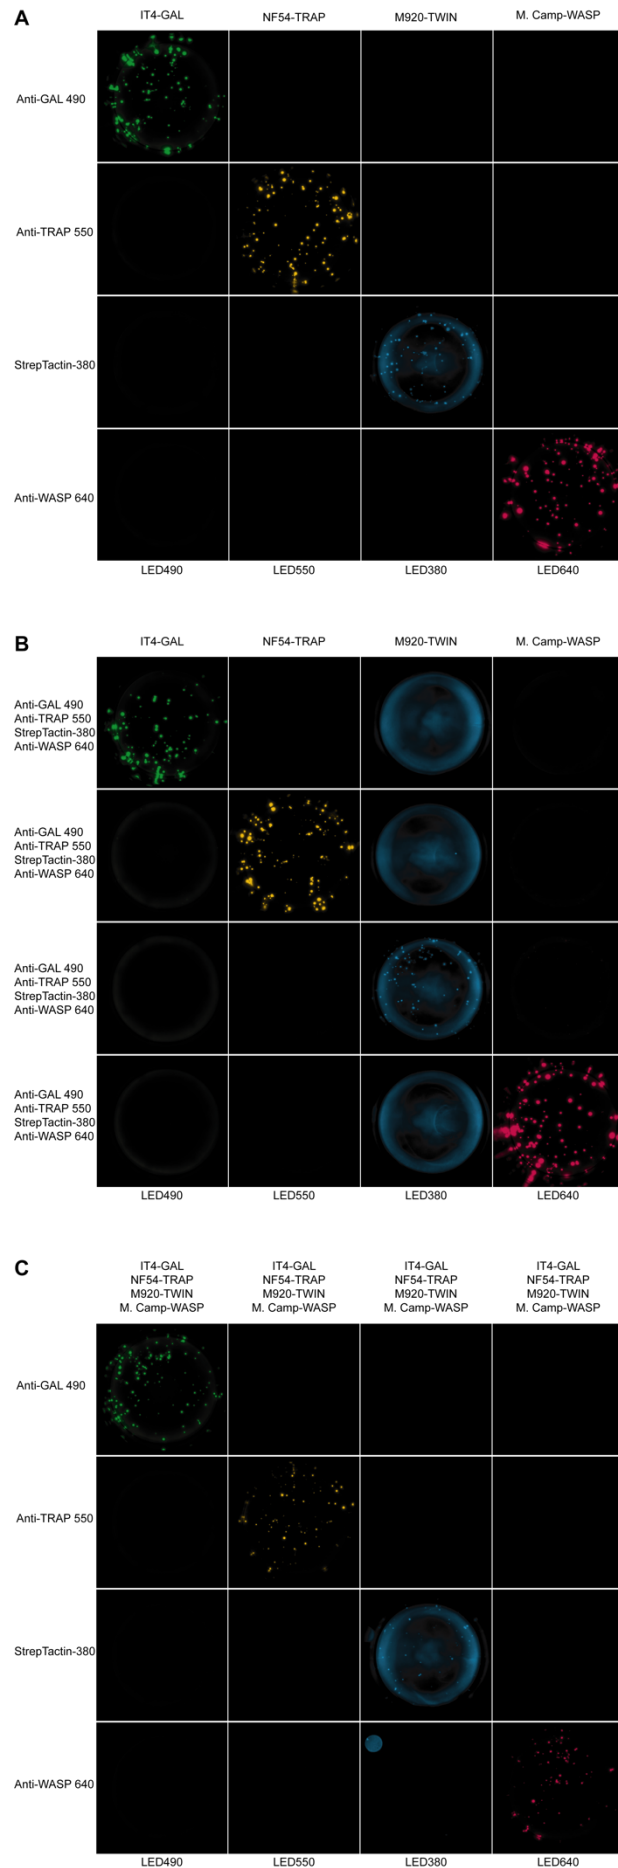

673        **Figure 4 – figure supplement 2.** Well images for the different antigen×detection reagent  
674 combinations tested for PAM2.8, corresponding to the schematic presented in Figure 4 – figure  
675 supplement 1. **(A)** 1×1, **(C)** 1×4 and **(D)** 4×1

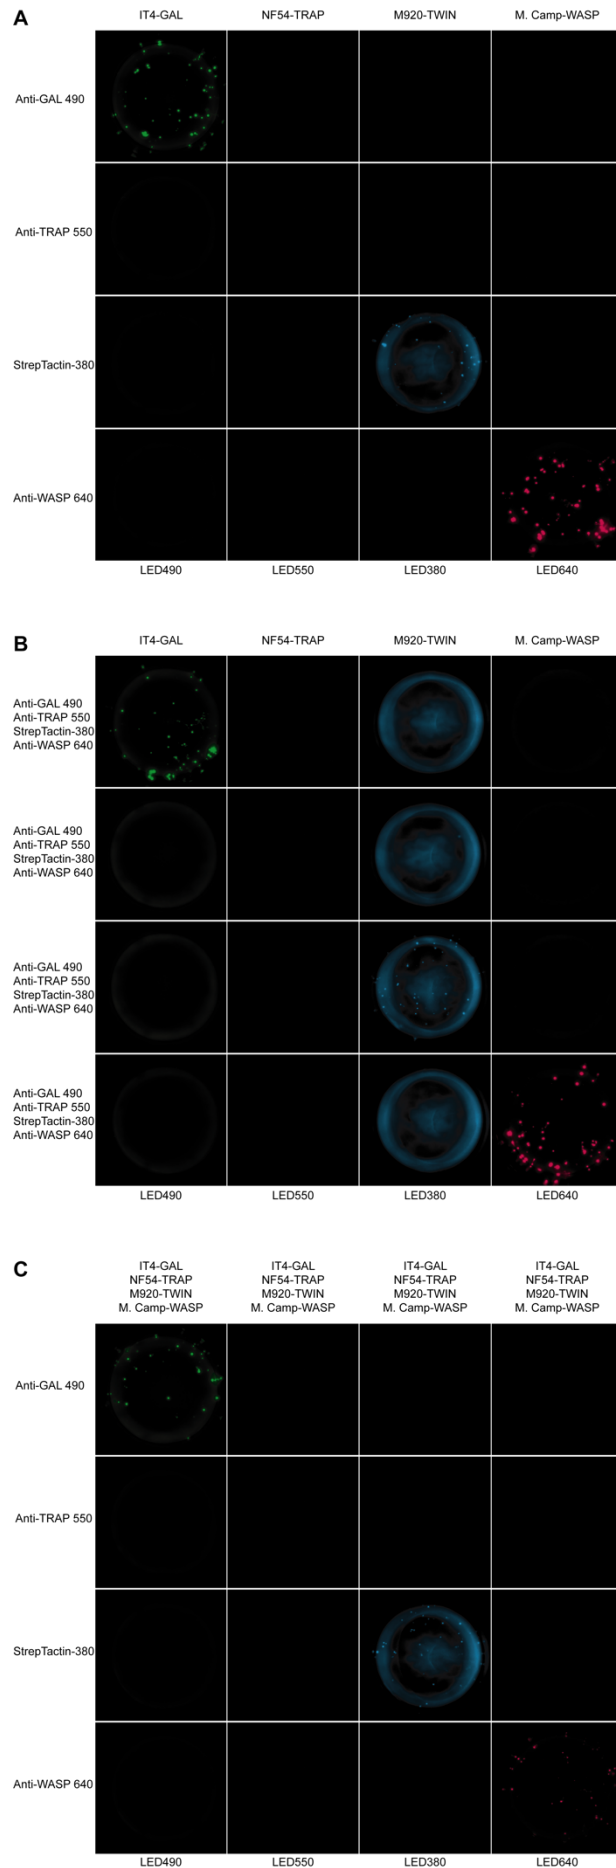

677        **Figure 4 – figure supplement 3.** Well images for the different antigen×detection reagent  
678 combinations tested for PAM8.1, corresponding to the schematic presented in Figure 4 – figure  
679 supplement 1. **(A)** 1×1, **(C)** 1×4 and **(D)** 4×1



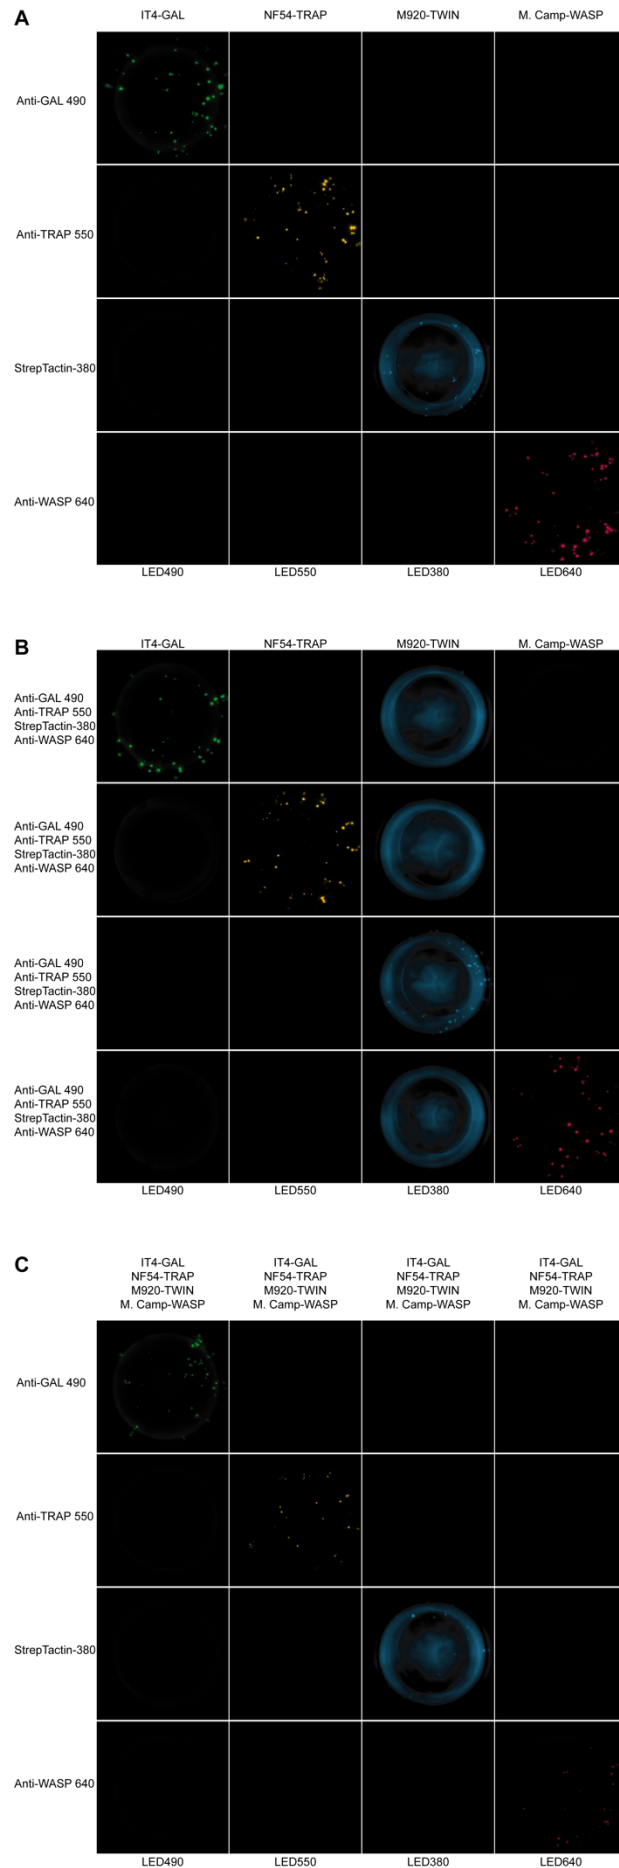

681        **Figure 4 – figure supplement 4.** Well images for the different antigen×detection reagent  
682 combinations tested for PAM3.10, corresponding to the schematic presented in Figure 4 – figure  
683 supplement 1. **(A)** 1×1, **(C)** 1×4 and **(D)** 4×1

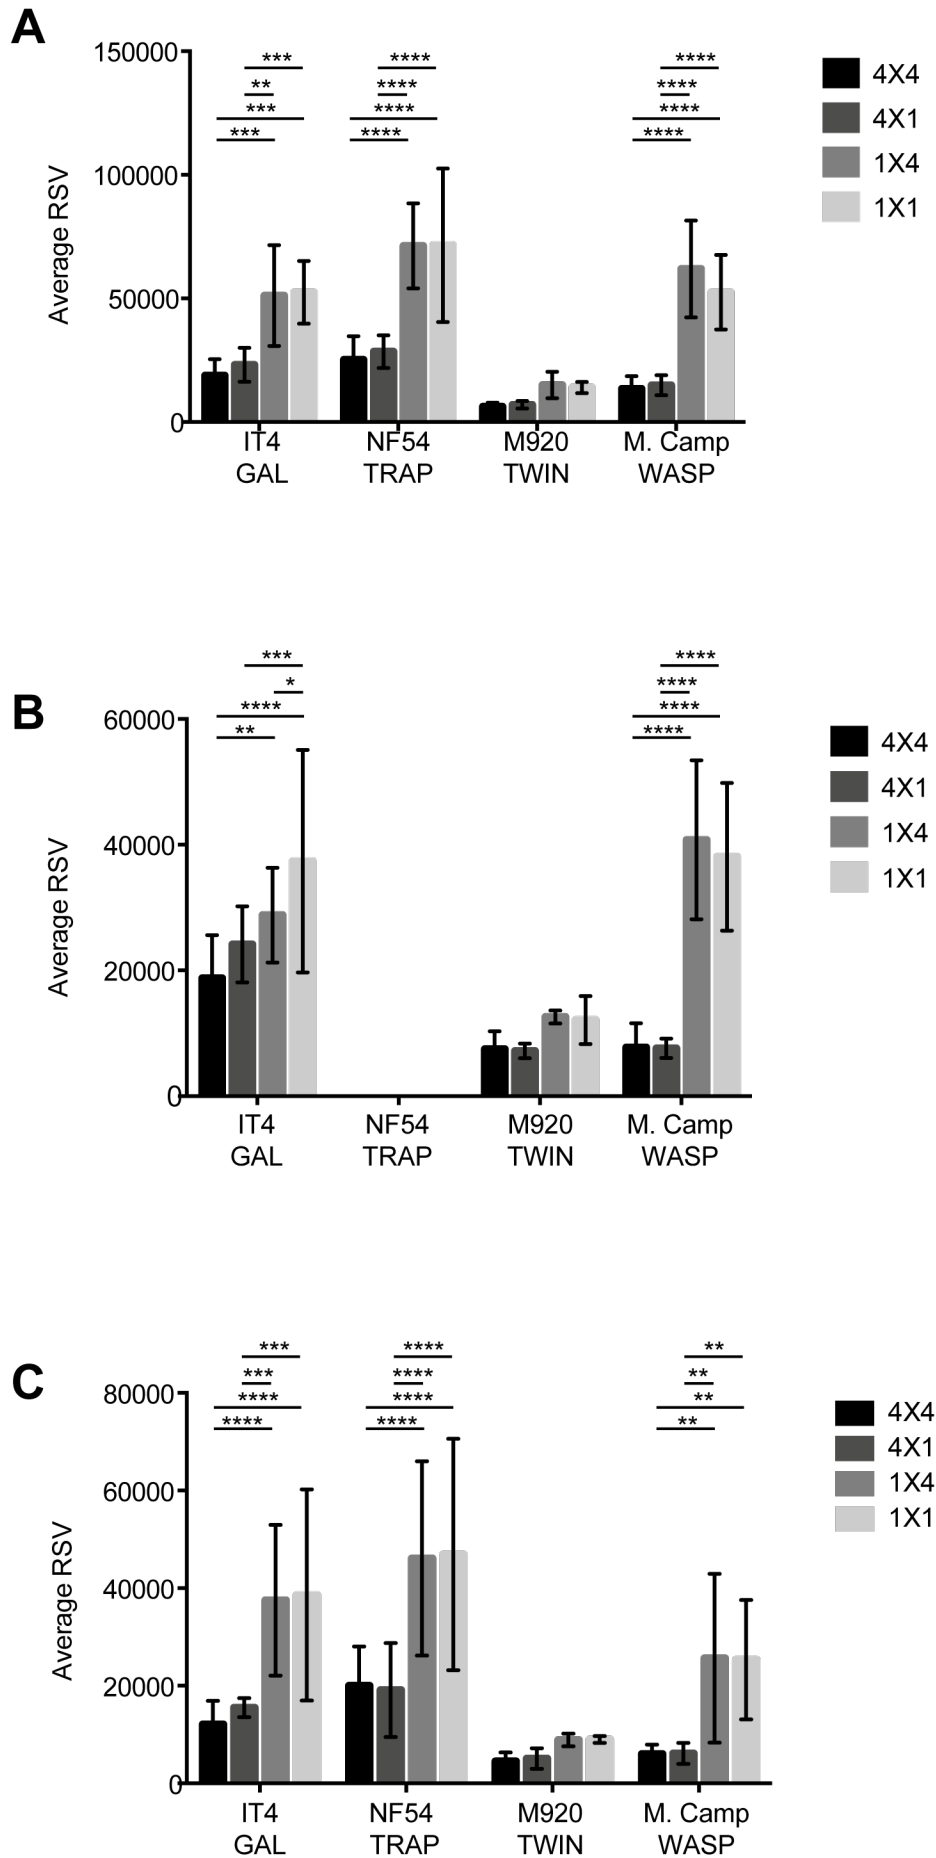

685        **Figure 4 – figure supplement 5.** Comparison of the average relative spot volume (RSV) for all the  
686 positive spots per antigen between the assay combinations for (A) PAM 2.8, (B) PAM8.1 and (C)  
687 PAM3.10

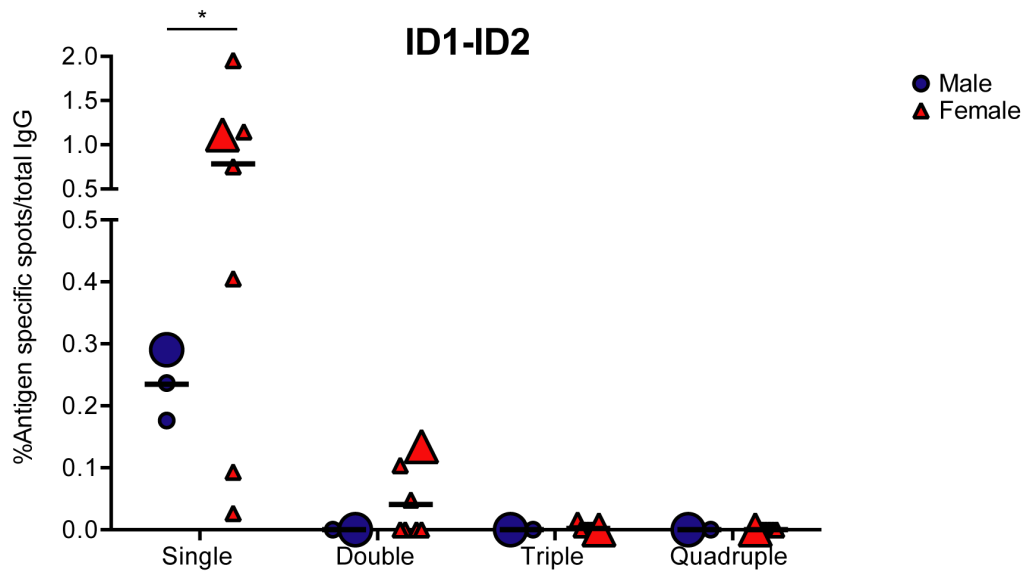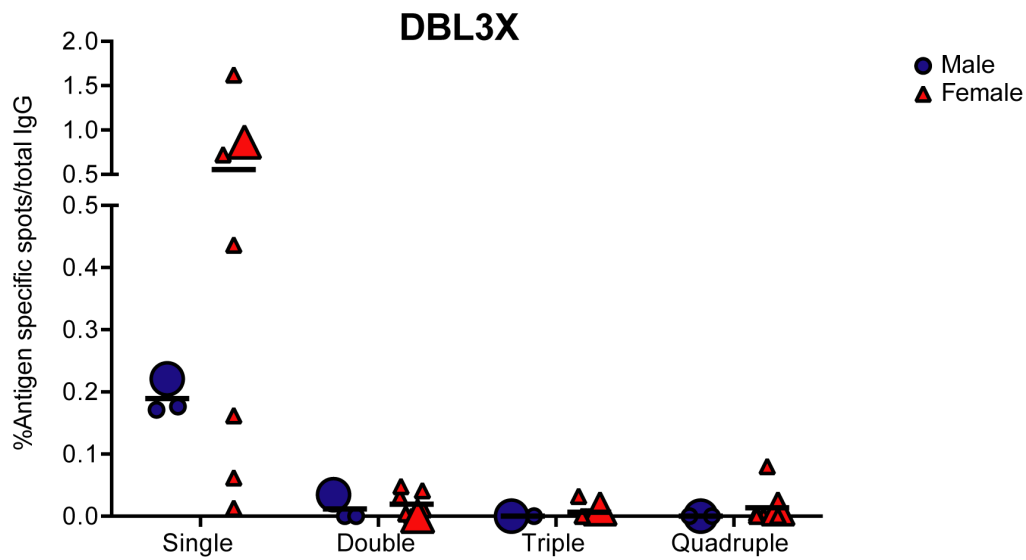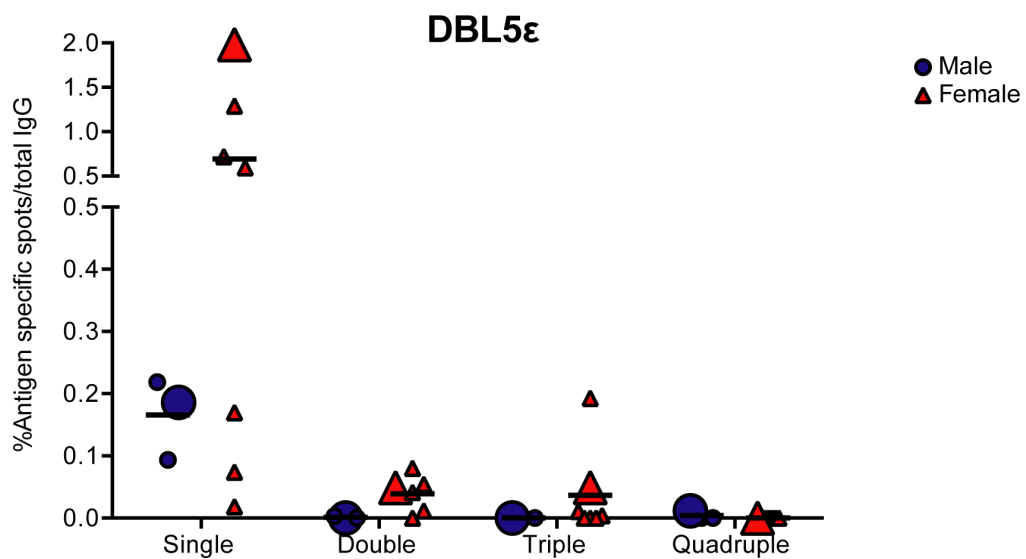

689 **Figure 5.** *VAR2CSA specific responses in malaria-exposed Ghanaian donors against four ID1-ID2 (A),*  
690 *DBL3X (B) and DBL5 $\epsilon$  (C) variants tested simultaneously.*

691 The scatter dot plots depict the percentages of antigen specific spots/total IgG secreting cells for  
692 each individual donor tested discriminating variant specific (single-coloured) and cross-reactive  
693 (double-, triple- and quadruple-positive) spots. Female and male donors are compared highlighting  
694 (with larger symbols) one representative donors for each group.

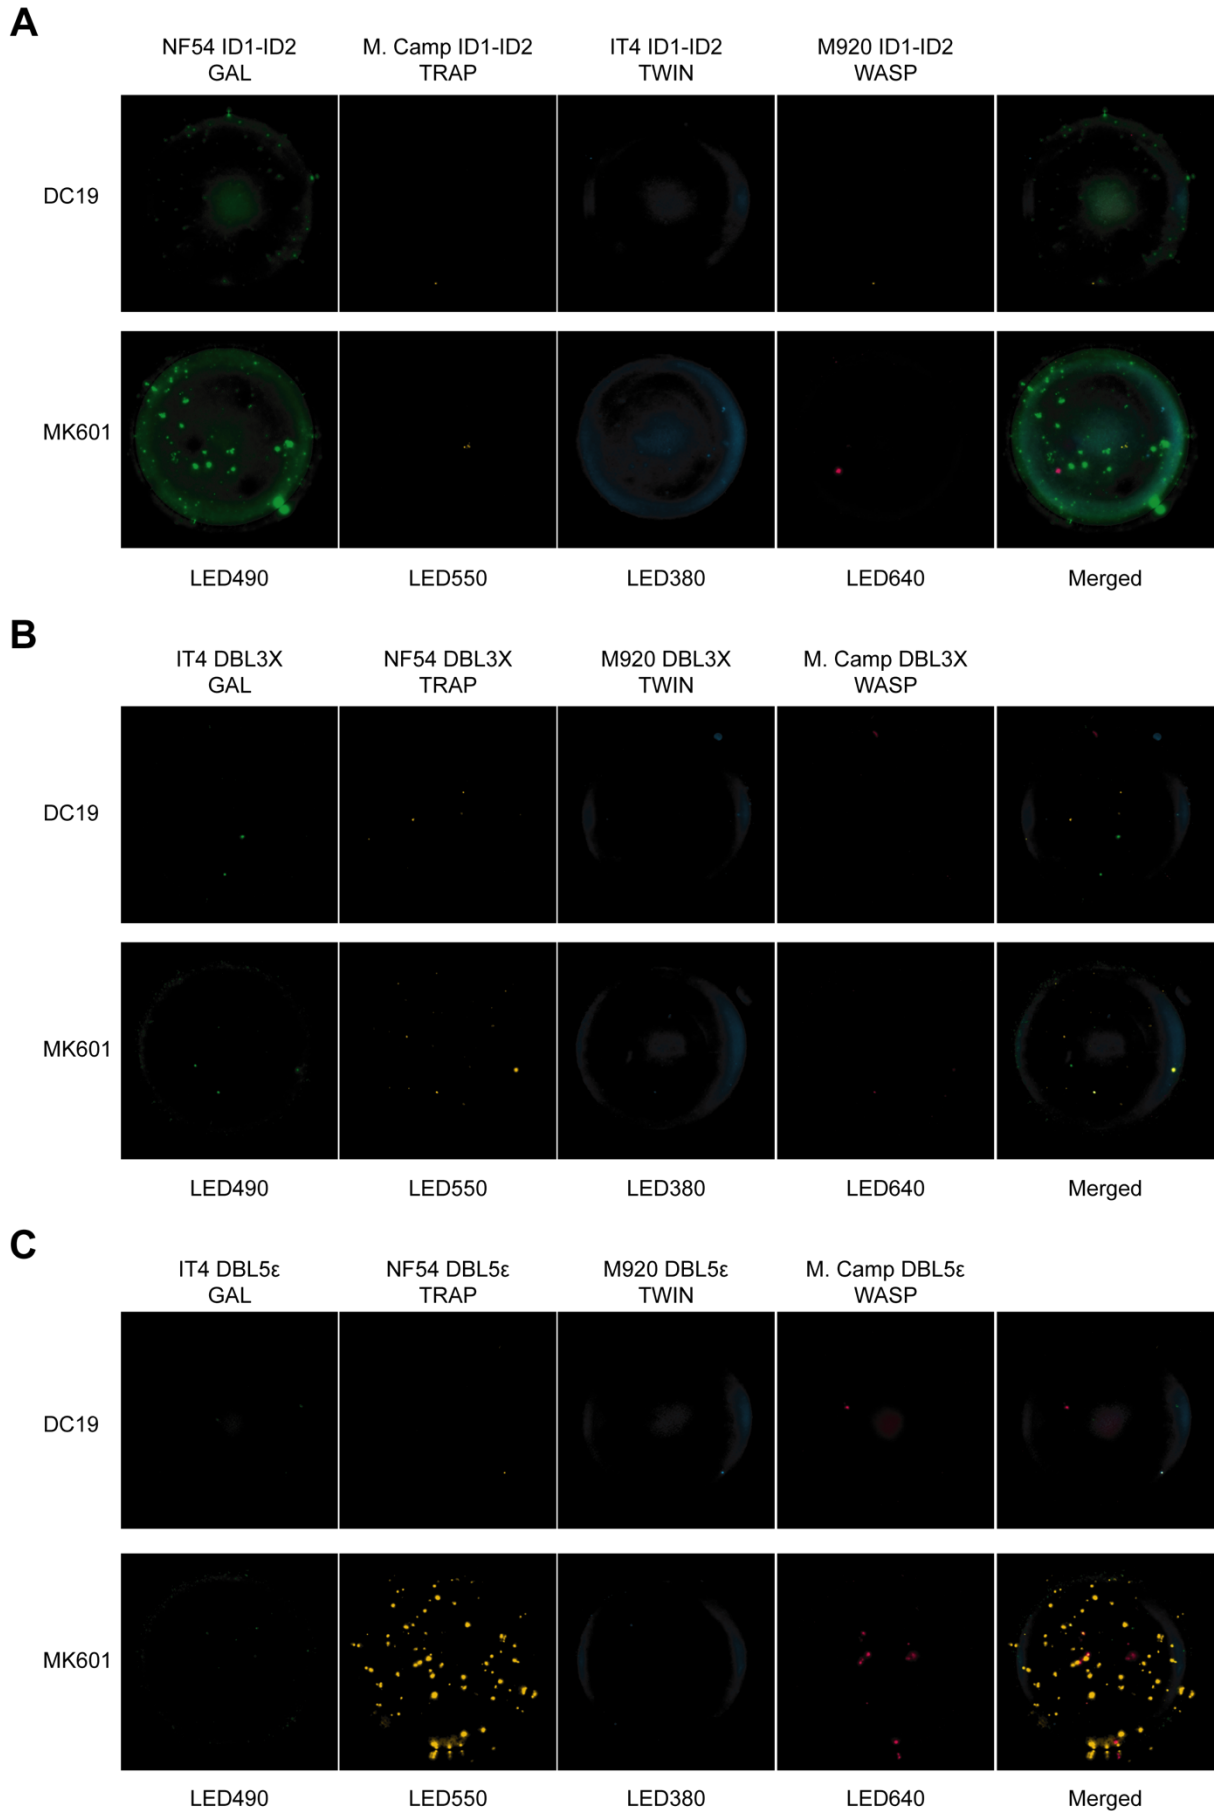

696 **Figure 5 – figure supplement 1.** Images acquired in each detection channel are presented  
697 (LED490, LED550, LED380 and LED640) for the two representative donors highlighted in Figure 5.  
698 DC19: malaria exposed male donor and MK601: malaria exposed female donor.

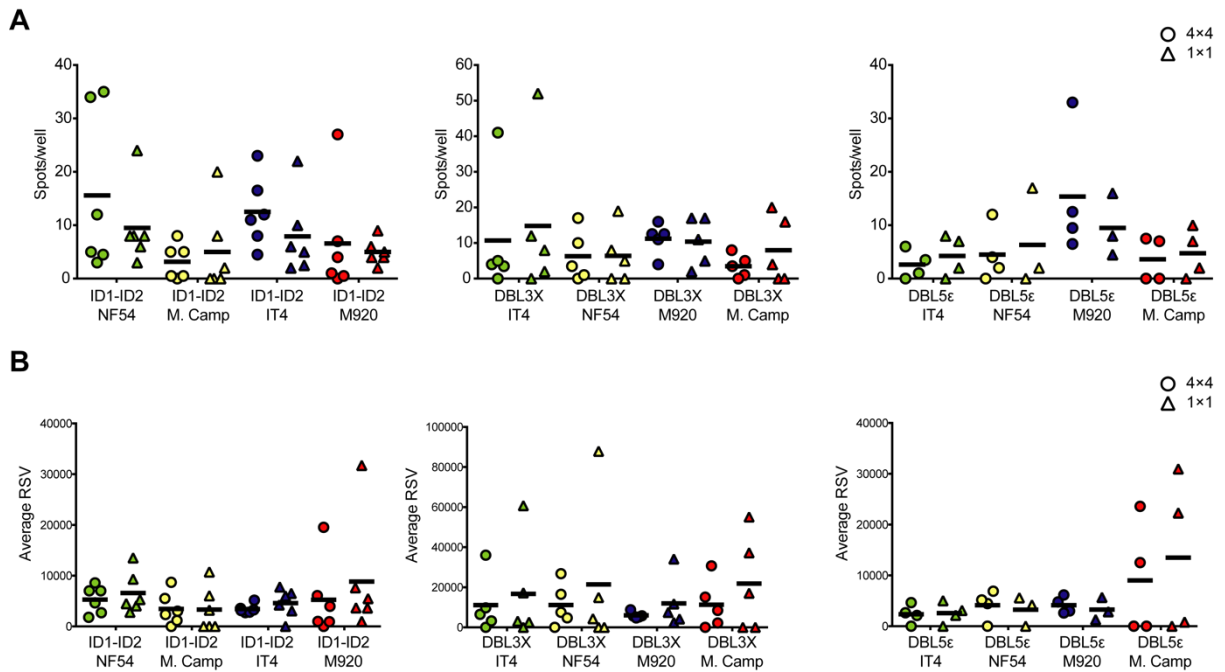

699

700 **Figure 5 – figure supplement 2.** Comparison of number spots/well (A) and average RSV (B) for  
701 each of the four VAR2CSA variants and three domains tested, either in a 4×4 (circles) or 1×1  
702 (triangles) configuration.
